1 **Transposable elements and their KZFP controllers are drivers of transcriptional innovation in the**  
2 **developing human brain**

3 Christopher J. Playfoot<sup>1</sup>, Julien Duc<sup>1</sup>, Shaoline Sheppard<sup>1</sup>, Sagane Dind<sup>1</sup>, Alexandre Coudray<sup>1</sup>, Evarist  
4 Planet<sup>1</sup> and Didier Trono<sup>1,2</sup>

5 <sup>1</sup>School of Life Sciences, Ecole Polytechnique Fédérale de Lausanne (EPFL), Lausanne, Switzerland

6 <sup>2</sup>Corresponding author. Didier.Trono@epfl.ch

7 **Abstract:**

8 Transposable elements (TEs) constitute 50% of the human genome and many have been co-opted  
9 throughout human evolution due to gain of advantageous regulatory functions controlling gene  
10 expression networks. Several lines of evidence suggest these networks can be fine-tuned by the largest  
11 family of TE controllers, the KRAB-containing zinc finger proteins (KZFPs). One tissue permissive for TE  
12 transcriptional activation (termed ‘transposcription’) is the adult human brain, however  
13 comprehensive studies on the extent of this process and its potential contribution to human brain  
14 development are lacking.

15 In order to elucidate the spatiotemporal transposcriptome of the developing human brain, we have  
16 analysed two independent RNA-seq datasets encompassing 16 distinct brain regions from eight weeks  
17 post-conception into adulthood. We reveal an anti-correlated, KZFP:TE transcriptional profile defining  
18 the late prenatal to early postnatal transition, and the spatiotemporal and cell type specific activation  
19 of TE-derived alternative promoters driving the expression of neurogenesis-associated genes. We also  
20 demonstrate experimentally that a co-opted antisense L2 element drives temporal protein re-  
21 localisation away from the endoplasmic reticulum, suggestive of novel TE dependent protein function  
22 in primate evolution. This work highlights the widespread dynamic nature of the spatiotemporal  
23 KZFP:TE transcriptome and its potential importance throughout neurotypical human brain  
24 development.

## 25 **Introduction**

26 KZFPs constitute the largest family of transcription factors encoded by mammalian genomes. These  
27 proteins harbor an N-terminal Krüppel-associated box (KRAB) domain and a C-terminal zinc finger  
28 array, which, for many, mediates sequence-specific DNA recognition. The KRAB domain of a majority  
29 of KZFPs recruits the transcriptional co-repressor KAP1 (KRAB-associated protein 1, also known as  
30 Tripartite motif protein 28, TRIM28), which acts as a scaffold for heterochromatin inducers such as the  
31 histone methyl-transferase SETDB1, the histone deacetylating NuRD complex, heterochromatin  
32 protein 1 (HP1) and DNA methyltransferases (Ecco et al. 2017). Many KZFPs bind to and repress TEs, a  
33 finding that led to the ‘arms race’ hypothesis, which states that waves of genomic invasion by TEs  
34 throughout evolution drove the selection of KZFP genes after they first emerged in the last common  
35 ancestor of tetrapods, lung fish and coelacanth some 420 million years ago (Jacobs et al. 2014;  
36 Imbeault et al. 2017). While partly supportive of this proposal, functional and phylogenetic studies  
37 point to a more complex model, strongly suggesting that KZFPs have facilitated the co-option of TE-  
38 embedded regulatory sequences (TEeRS) into transcriptional networks throughout tetrapod evolution  
39 (Najafabadi et al. 2015; Imbeault et al. 2017; Helleboid et al. 2019). TEeRS indeed host an abundance  
40 of transcription factor (TF) binding sites (Bourque et al. 2008; Sundaram et al. 2014), and KZFPs and  
41 their TE targets influence a broad array of biological processes from early embryogenesis to adult life,  
42 conferring a high degree of species specificity (Trono 2015; Pontis et al. 2019; Chuong et al. 2013, 2016;  
43 Turelli et al. 2020). TEeRS can act as enhancers, repressors, promoters, terminators, insulators or via  
44 post-transcriptional mechanism (Garcia-Perez et al. 2016; Chuong et al. 2017). While these co-opted  
45 TE functions are key to human biology, their deregulation can also contribute to pathologies such as  
46 cancer and neurodegenerative diseases (Jang et al. 2019; Attig et al. 2019; Chuong et al. 2016; Li et al.  
47 2015; Ito et al. 2020; Jönsson et al. 2020).

48 KZFPs and TEs are broadly expressed during human early development, playing key roles in embryonic  
49 genome activation and controlling transcription in pluripotent stem cells (Theunissen et al. 2016;

50 Pontis et al. 2019; Turelli et al. 2020). However, how much TEeRS and their polydactyl controllers  
51 influence later developmental stages and the physiology of adult tissues is still poorly defined.  
52 Intriguingly, KZFPs are collectively more highly expressed in the human brain than in other adult  
53 tissues, suggesting a prominent impact for these epigenetic regulators and their TEeRS targets in the  
54 function of this organ (Nowick et al. 2009; Imbeault et al. 2017; Farmiloe et al. 2020; Turelli et al. 2020).  
55 In line with this hypothesis, we recently described how ZNF417 and ZNF587, two primate specific KZFPs  
56 repressing HERVK (human endogenous retrovirus K) and SVA (SINE-VNTR-Alu) integrants in human  
57 embryonic stem cells (hESC), are expressed in specific regions of the human developing and adult brain  
58 (Turelli et al. 2020). Through the control of TEeRS, these KZFPs influence the differentiation and  
59 neurotransmission profile of neurons and prevent the induction of neurotoxic retroviral proteins and  
60 an interferon-like response (Turelli et al. 2020). Furthermore, expression of LINE1, another class of TEs,  
61 has been noted in human neural progenitor cells (hNPCs) and in the adult human brain, occasionally  
62 leading to *de novo* retrotransposition events (Muotri et al. 2005; Coufal et al. 2009; Muotri et al. 2010;  
63 Upton et al. 2015; Erwin et al. 2016; Guffanti et al. 2018). Finally, various patterns of TE de-repression  
64 have been reported in several neurodevelopmental and neurodegenerative disorders, indicating that  
65 a de-regulated ‘transposcriptome’ may be detrimental to brain development or homeostasis (Tam et  
66 al. 2019; Jönsson et al. 2020).

67 A growing number of genomic studies relying on bulk RNA sequencing (RNA-seq), single cell RNA  
68 sequencing (scRNA-seq), assay for transposase accessible chromatin using sequencing (ATAC-seq) and  
69 other types of epigenomic analyses are teasing apart the transcriptional landscape of the developing  
70 human brain, revealing its dynamism and the complexity of the underlying cellular make-up (Kang et  
71 al. 2011; Miller et al. 2014; Fullard et al. 2018; Li et al. 2018; Keil et al. 2018; Zhong et al. 2018; Cardoso-  
72 Moreira et al. 2019). The present work was undertaken to explore the contribution of TEs and their  
73 KZFP controllers to this process. Our results identify KZFPs and TEeRS as important spatiotemporal  
74 contributors to gene expression in both the developing and adult brain, and reveal how neurological  
75 proteins with modified characteristics can arise from TE-mediated transcriptional innovations.

## 76 **Results**

### 77 **Spatiotemporal patterns of KZFP gene expression during brain development**

78 In order to determine the spatiotemporal patterns of KZFPs and TE expression in human neurogenesis,  
79 we analysed RNA-seq data from 507 samples corresponding to 16 different brain regions and 12  
80 developmental stages (from 4 weeks post-conception to adulthood) available through the Brainspan  
81 Atlas of the Human Brain (Miller et al. 2014) and through Cardoso-Moreira et al. 2019 (Supplemental  
82 Fig. S1A & B). While the latter dataset comprises 114 samples exclusively from dorsolateral frontal  
83 cortex (DFC) and cerebellum (CB), transcriptomes for these regions were largely concordant with those  
84 documented in Brainspan, justifying the two resources as suitable for reciprocal validation  
85 (Supplemental Fig. S1C & D; Supplemental Table 1 & 2). We first examined KZFP gene expression in  
86 these two brain regions, which are representative of the forebrain and the hindbrain, respectively  
87 (Supplemental Fig. S1B). The large majority of KZFPs expressed in the DFC exhibited higher levels at  
88 early prenatal stages to drop shortly before birth and remain low onwards (Fig. 1A). When comparing  
89 early prenatal (2A-3B; 8-18 post-conception weeks) and adult (11; age 20-60+ years) stages, about half  
90 (169/333) of KZFPs were more expressed in the former and only 1.5% (5/333) in the latter, the rest  
91 being stable (Fig. 1B). This temporal pattern was less striking in the cerebellum (Supplemental Fig. S2A),  
92 with only 15.9% (53/333) and 2.1% (7/333) of KZFPs more strongly expressed in early prenatal and in  
93 adult respectively (Supplemental Fig. S2B). Thus, KZFP gene expression patterns are characterized by  
94 both temporal and regional specificity.

95 KZFP genes have emerged continuously during higher vertebrate evolution, collectively undergoing a  
96 high turnover in individual lineages. Amongst some 360 human KZFPs, about half are primate-  
97 restricted, whereas a few are highly conserved, with orthologous sequences present in species that  
98 diverged more than 300 million years ago (Imbeault et al. 2017; Huntley et al. 2006). To determine if  
99 the differentially

## Playfoot\_Fig. 1

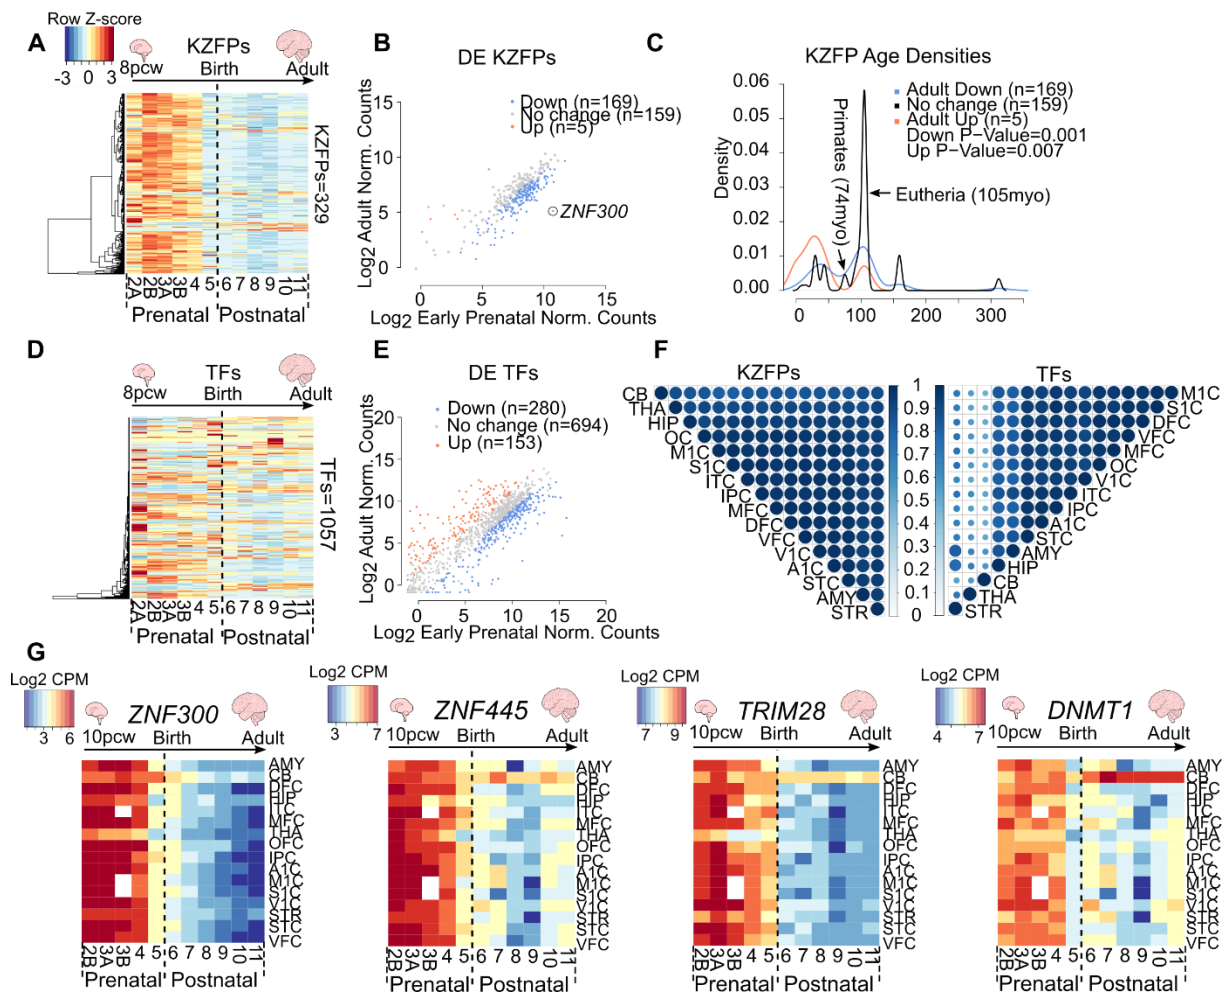

100

101 **Figure 1. KZFP genes exhibit a global pre to postnatal decrease in expression.** (A) Heatmaps of KZFP  
 102 expression across human neurogenesis in the DFC. Scale represents the row Z-score. See also  
 103 Supplemental Table 2 (B) Dot plot of differential expression analysis of KZFP genes in the DFC  
 104 comparing adult (stage 11) to early prenatal stages (stage 2A to 3B) of neurogenesis. Only KZFPs  
 105 differentially expressed in both datasets are shown. Up (orange) represents KZFPs significantly  
 106 upregulated in adult versus early prenatal (Fold change  $\geq 2$ , FDR  $\leq 0.05$ ). Down (blue) represents KZFPs  
 107 significantly downregulated in adult (Fold change  $\leq -2$ , FDR  $\leq 0.05$ ). See also Supplemental Table 3. (C)  
 108 Density plot depicting estimated age of KZFPs of each category in (B) ( $P \leq 0.05$ , Wilcoxon test). (D)  
 109 Heatmaps of TF expression across human neurogenesis in the DFC. Scale same as in A. (E) Dot plot of  
 110 differential expression analysis of TFs (as defined in Lambert et al., 2018) in the DFC, excluding KZFP  
 111 genes, comparing adult (stage 11) to early prenatal stages (stage 2A to 3B) of neurogenesis. Only TFs  
 112 differentially expressed in both datasets are shown. Up (orange) represents TFs significantly  
 113 upregulated in adult versus early prenatal (Fold change  $\geq 2$ , FDR  $\leq 0.05$ ). Down (blue) represents KZFPs  
 114 significantly downregulated in adult (Fold change  $\leq -2$ , FDR  $\leq 0.05$ ). See also Supplemental Table 3. (F)  
 115 Correlation plots representing the Pearson correlation coefficient of temporal KZFP expression (left)  
 116 and TF expression (right) between all 16 regions. Size of spot and colour both represent the correlation  
 117 coefficient. 0=no correlation, 1=strong correlation. (G) Heatmaps depicting the log2 counts per million  
 118 (CPM) for selected KZFPs and TFs over the 16 regions included. See also Supplemental Table 1 & 2. All  
 119 plots show expression data from Brainspan.

120 expressed KZFPs arose at particular times in evolution, we determined their ages. We found KZFPs  
121 either significantly downregulated or upregulated from early prenatal to adult stages to be significantly  
122 younger than those displaying no differences between these developmental periods (Fig. 1C, Wilcoxon  
123 test  $p \leq 0.01$ ). This delineates two subsets amongst KZFPs participating in brain development, one  
124 evolutionarily recent and more transcriptionally dynamic, the other more conserved and  
125 transcriptionally static.

126 Of note, KZFPs appeared distinct amongst TFs (as defined in Lambert et al. 2018), as other members  
127 of this functional family exhibited far more diverse patterns of expression throughout development,  
128 whether in the forebrain or in the cerebellum (Fig. 1D & E; Supplemental Fig. S2C & D). Only about a  
129 quarter of TFs were indeed more highly expressed in early prenatal stages in either region, against  
130 around 10% in the adult brain (Fig. 1E; Supplemental Fig. S2C & D). Furthermore, temporal expression  
131 patterns of KZFP genes were highly correlated across all 16 brain regions, albeit to a lesser extent in  
132 the cerebellum (Fig. 1F). In contrast, other TFs displayed far more diverse behaviours, with the CB,  
133 mediodorsal nucleus of the thalamus (THA) and striatum (STR) exhibiting reduced correlation values  
134 compared to other regions (Fig. 1F). Thus, KZFPs are collectively subjected to a remarkable degree of  
135 spatiotemporal coordination in spite of the diversity of their genomic targets and of cell types present  
136 in the various regions of the brain. The KZFP gene most differentially expressed in prenatal versus  
137 postnatal DFC was the hematopoietic differentiation associated *ZNF300* (Xu et al. 2010) (Fig. 1B;  
138 Supplemental Table 3). This was true in all brain regions, although its transcripts persisted longer in  
139 the cerebellum compared to other areas (Fig. 1G; Supplemental Table 1 & 2). *ZNF445*, which binds and  
140 controls imprinted loci in humans (Takahashi et al. 2019), similarly exhibited comparable patterns  
141 across all brain regions but its expression was largely maintained in the cerebellum all the way to  
142 adulthood (Fig. 1G; Supplemental Table 1 & 2).

143 We next examined *KAP1*, which encodes a protein that serves as corepressor for many KZFP (Ecco et  
144 al. 2017). Its expression levels were globally higher than those of any KZFP, albeit also with a drop from

145 prenatal to postnatal stages except in the cerebellum (Fig. 1G; Supplemental Table 1 & 2). We also  
146 probed *DNMT1*, which encodes the maintenance DNA methyltransferase important for TE repression  
147 in neural progenitor cells and other somatic tissues beyond the early embryonic period (Jönsson et al.  
148 2019). Although displaying overall patterns comparable to those seen for *KZFPs* and *KAP1*, *DNMT1*  
149 expression progressively increased in the cerebellum to reach its highest level in the adult (Fig. 1G;  
150 Supplemental Table 1 & 2). In sum, *KZFPs* and their main epigenetic cofactors exhibit a largely  
151 homogenous, dynamic spatiotemporal reduction in expression during human brain development.

### 152 **TE subfamilies are dynamically expressed throughout development**

153 Having determined that the expression of most *KZFPs* drops at late stages of prenatal brain  
154 development, we examined the behaviour of their TE targets. Young TEs are highly repetitive, which  
155 complicates the mapping of TE-derived RNA-seq reads to unique genomic loci, thus biasing against the  
156 scoring of their expression. We therefore first analysed RNA-seq reads mapping to multiple TE loci  
157 within the same subfamily, regardless of positional information. In the DFC, discrete subfamilies,  
158 predominantly from the LTR class and to a lesser extent the SINE class, exhibited temporally distinct  
159 dynamics, concordant between datasets (Pearson correlation coefficient  $\geq 0.7$ ) (Fig. 2A; Supplemental  
160 Table 4). The same was true for the cerebellum, but with moderately different subfamilies passing our  
161 threshold for concordance between datasets (Supplemental Fig. S3A; Supplemental Table 4). In the  
162 DFC, for example, the LTR7C and SVA-D subfamilies exhibited higher postnatal expression, whereas  
163 LTR70 and HERVK13-int behaved inversely, albeit without marked differences between brain regions  
164 (Fig. 2B; Supplemental Table 4 & 5). Similarly to *KZFP* genes, TEs have emerged continuously  
165 throughout evolution, with both young integrants and relics of ancient TEs reflective of different waves  
166 of genomic invasion. Using TE subfamily age estimates from DFAM (Hubley et al. 2016), we found that  
167 dynamically expressed TEs, concordant between both datasets, were significantly younger than non-  
168 concordantly expressed subfamilies in the DFC and cerebellum (Fig. 2C; Supplemental Fig. S3B).



## Playfoot\_Fig. 2

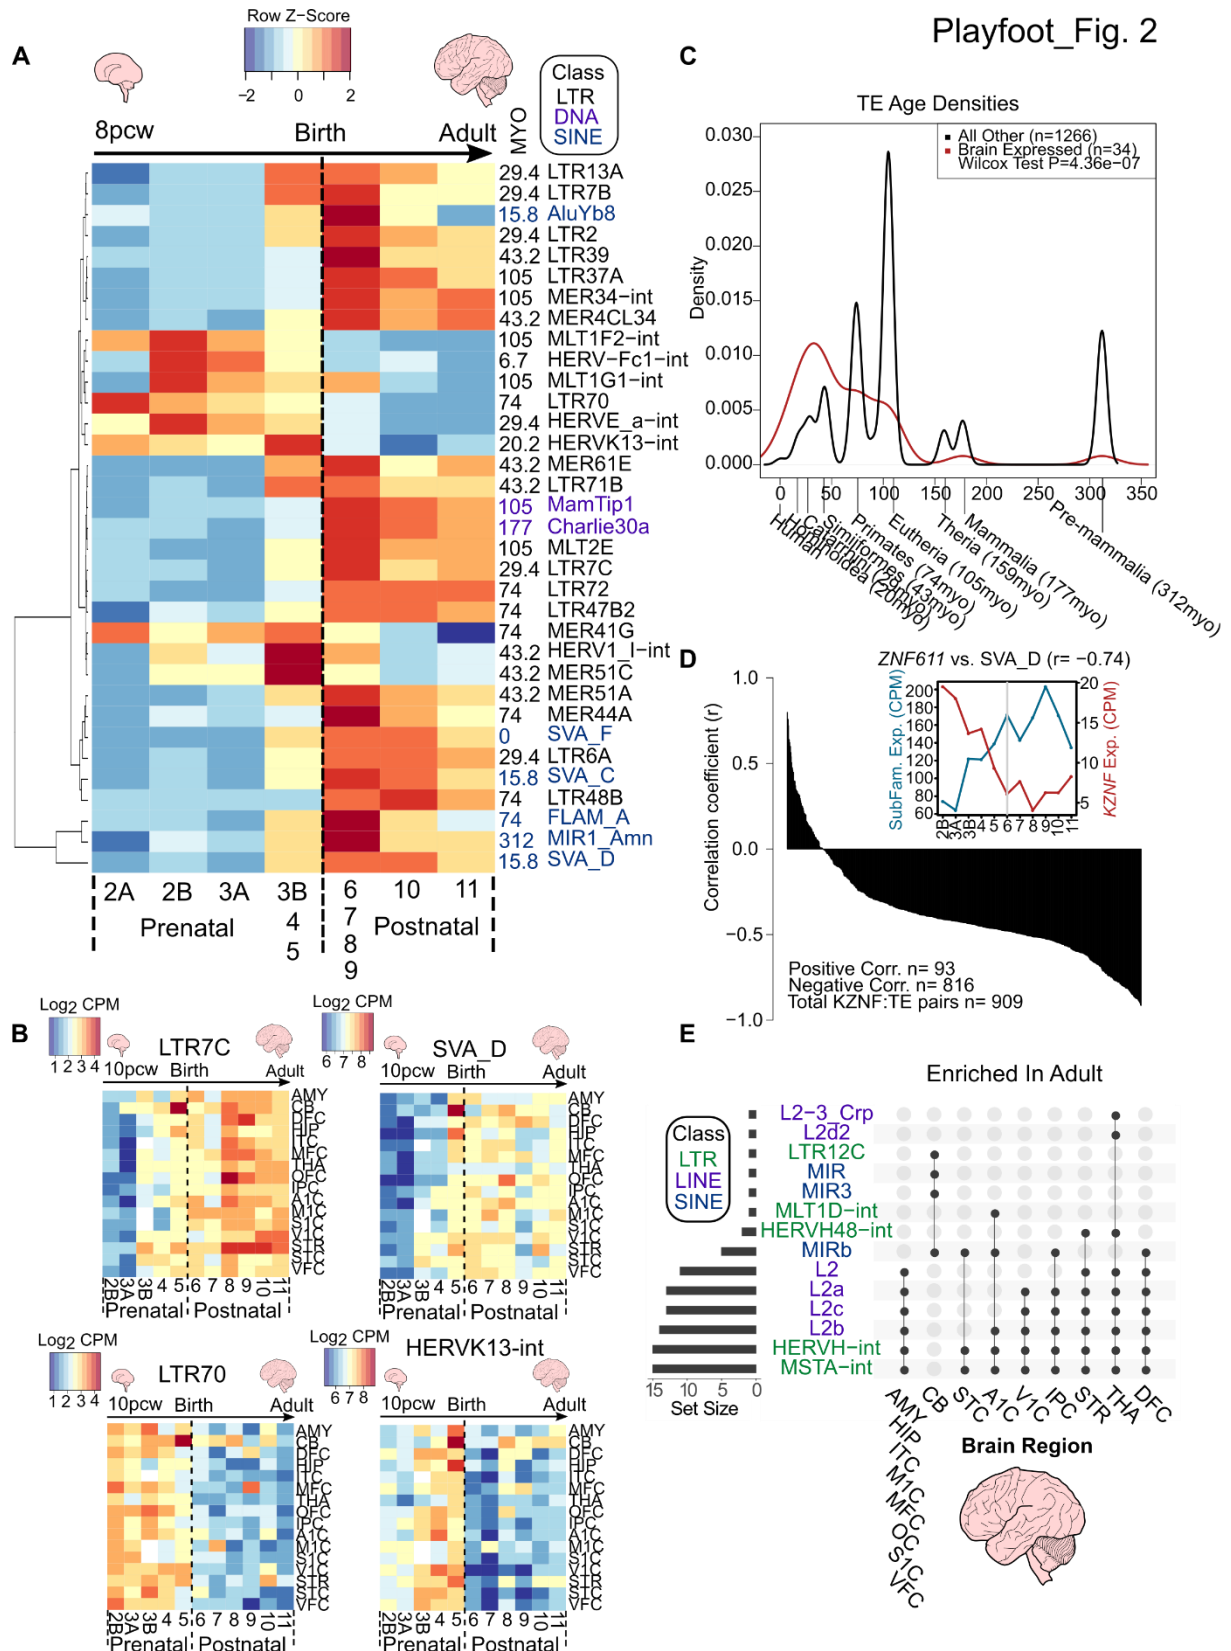

169

170

171



172 **Figure 2. TE subfamilies and unique loci exhibit spatiotemporal expression patterns.** (A) Heatmap of  
173 TE subfamilies with concordant expression behaviours between both datasets (Pearson correlation  
174 coefficient  $\geq 0.7$ ) across human neurogenesis in the DFC. See also Supplemental Table 4. The mean  
175 expression values for stages 3B, 4 and 5, and also stages 6, 7, 8 and 9 were combined and averaged to  
176 reduce inherent variability due to low numbers of samples for some stages (see Supplemental Fig.  
177 S1B). Scale represents the row Z-score. TE subfamily age in million years old (MYO) and class is shown  
178 to the right of the plot. (B) Heatmaps of TE subfamily expression across human neurogenesis in all 16  
179 regions. See also Supplemental Table 4 & 5. Scale represents log<sub>2</sub> CPM. Stage 2A was omitted due to  
180 lack of samples for some brain regions (see Supplemental Fig. S1B). (C) Density plot depicting estimated  
181 age of TEs in A ( $P \leq 0.05$ , Wilcoxon test). Evolutionary stages and corresponding ages are shown beneath  
182 the plot. (D) Barplot showing the Pearson correlation coefficient of KZFP expression and their target  
183 TE subfamily expression. 1=highly correlated, -1=highly anti-correlated. (D Inset) Line plot showing  
184 expression in counts per million of *ZNF611* and its main TE target subfamily, SVA\_D and their Pearson  
185 correlation coefficient (-0.74, p-value=0.006). Grey line indicates birth at stage 6. See also  
186 Supplemental Table 6. (E) UpSet plot showing the significantly enriched differentially expressed  
187 subfamilies between adult and early pre-natal stages per region from unique mapping analyses. Set  
188 size represents the number of regions the specific TE was significantly differentially enriched in. Joined  
189 points represent combinations of significantly differentially expressed TE subfamilies. See also  
190 Supplemental Table 7 and 8. All plots show expression data from Brainspan.

191

192 We next analysed the temporal dynamics of the expression of KZFPs and their TE targets in the DFC,  
193 for which samples were available in highest abundance. For this, we matched KZFP ligands to their  
194 significantly bound TE subfamilies using an in-house algorithm on a large collection of ChIP-exo data  
195 (Imbeault et al. 2017). The results revealed that an overwhelming majority of KZFP:TE subfamily pairs  
196 (816 vs. 93) were anti-correlated in their expression, consistent with the known role of KZFPs as TE  
197 repressors (Fig. 2D; Supplemental Table 6). For example, *ZNF611* is a previously characterised major  
198 regulator of SVA-D in early embryogenesis (Pontis et al. 2019), and the two exhibited strongly anti-  
199 correlated expression throughout human brain development (Fig. 2D inset).

200 We next expanded our study by examining the expression of individual TE integrants, assigning RNA-  
201 seq reads to their genomic source loci and comparing early prenatal (stages 2A to 3B) and adult (stage  
202 11) samples for the 16 available brain regions (Supplemental Fig. S1A & B). We found between 5,000  
203 and 7,000 significant differentially expressed TE loci in each region, with 4,000 loci common to both  
204 DFC and CB datasets (Supplemental Fig. S3C; Supplemental Table 7 & 8). Integrants belonging to  
205 fourteen TE subfamilies from the LTR, LINE and SINE classes were significantly more expressed in adult

206 samples, with HERVH-int, MSTA-int and L2 elements significantly enriched in most brain regions (Fig.  
207 2E). The cerebellum again exhibited distinct patterns, with significant enrichment of LTR12C and MIR  
208 elements instead (Fig. 2E). Conversely, integrants from 11 TE subfamilies were more expressed in the  
209 early prenatal period, largely in specific brain regions (Supplemental Fig. S3D). Together, these results  
210 highlight the spatiotemporal dynamic nature of the transposcriptome in the developing human brain.

### 211 **Transpochimeric gene transcripts during human brain development**

212 TE expression may be reflective of either ‘passive’ co-transcription from genic transcripts or *bona fide*  
213 TE promoter activity (reviewed in Lanciano and Cristofari 2020). Transpochimeric gene transcripts  
214 (TcGTs), that is, gene transcripts driven by TE-derived promoters, are the most easily interpretable and  
215 direct manifestation of the influence of TEeRS on gene expression. Some evidence for a role of TcGTs  
216 in the brain was provided by the recent observation that DNMT1 represses in hNPCs the expression of  
217 hominoid-restricted LINE1 elements, which subsequently act as alternative promoters for genes  
218 involved in neuronal functions (Jönsson et al. 2019). To explore more broadly the potential role of  
219 TcGTs in human brain development and function, we performed *de novo* transcript assembly,  
220 searching for mature transcripts with a TE-derived sequence at their 5’ end and the coding sequence  
221 of a cellular gene downstream. Due to the striking anti-correlation in KZFP and global TE expression  
222 between prenatal (stage 2A to stage 5) and postnatal stages (stage 6 to stage 11), we concentrated on  
223 these two periods, retaining only TcGTs present in greater than 20% of either prenatal, postnatal or  
224 both categories of samples and behaving in the same temporal manner in the two independent  
225 datasets. If there was a two-fold difference in the proportion of prenatal versus postnatal, the TcGT  
226 was annotated as either pre- or postnatal, whereas those below this threshold were deemed continual.  
227 Our search yielded 480 high confidence TcGTs, of which 9.8% (47/480) were prenatal, 12.3% (59/480)  
228 postnatal and 72.3% (374/480) continual (Fig. 3A; Supplemental Table 9). Amongst pre- or postnatal  
229 TcGTs, developmental trajectories differed substantially, with some detected exclusively at either  
230 stage. For example, an L2a-driven isoform of *CTP synthase 2 (CTPS2)*, whose product catalyses CTP

231 formation from UTP (van Kuilenburg et al. 2000), was found in 86% of all prenatal samples but only  
232 12% of postnatal samples (Fig. 3A & B), whereas the inverse was observed for a MamGypLTR1b-driven  
233 isoform of the astrocyte associated *Aldehyde Dehydrogenase 1 Family Member A1 (ALDH1A1)* (Adam  
234 et al. 2012) (12% vs. 95%) and an L2b-driven isoform of *Phospholysine Phosphohistidine Inorganic*  
235 *Pyrophosphate Phosphatase (LHPP)* (0.9% vs. 97%) (Fig. 3A), the host of intronic single nucleotide  
236 polymorphisms (SNPs) associated with major depressive disorder (Neff et al. 2009; Cui et al. 2016). The  
237 previously reported LTR12C-driven transcript of *Semaphorin 4D (SEMA4D)*, the product of which  
238 participates in axon guidance (Cohen et al. 2009; Kumanogoh and Kikutani 2004), was detected in 79%  
239 of postnatal and only 0.9% of prenatal samples where it was instead expressed from a non-TE  
240 promoter, indicating a promoter switch during neurogenesis (Fig. 3A & B).

241 We next examined the broader expression pattern of the 480 TcGTs detected during brain  
242 development. By applying our pipeline to the Genotype Tissue Expression (GTEx) dataset (Melé et al.  
243 2015), we detected around half of them in this collection of predominantly adult samples (Fig. 3C;  
244 Supplemental Table 9). Some were present in all available tissues, but the vast majority were brain  
245 restricted (Fig. 3C).

#### 246 **TcGTs exhibit cell type-specific modes of expression**

247 We next analysed the state of the chromatin at the transcription start site (TSS) of the 480 TcGTs  
248 expressed during brain development by intersecting their proximal, TE-residing TSS (+/-200bp) with  
249 ATAC-seq consensus peaks from neuronal (NeuN+) and non-neuronal (NeuN-) cells across 14 distinct  
250 adult brain regions from the Brain Open Chromatin Atlas (BOCA) (Fullard et al. 2018). About a quarter  
251 (111/480) of these TcGTs TSS overlapped with ATAC-seq peaks in the adult brain, indicating that their  
252 chromatin was opened in this setting (Fig. 3D). Of these, two-thirds exhibited cell type

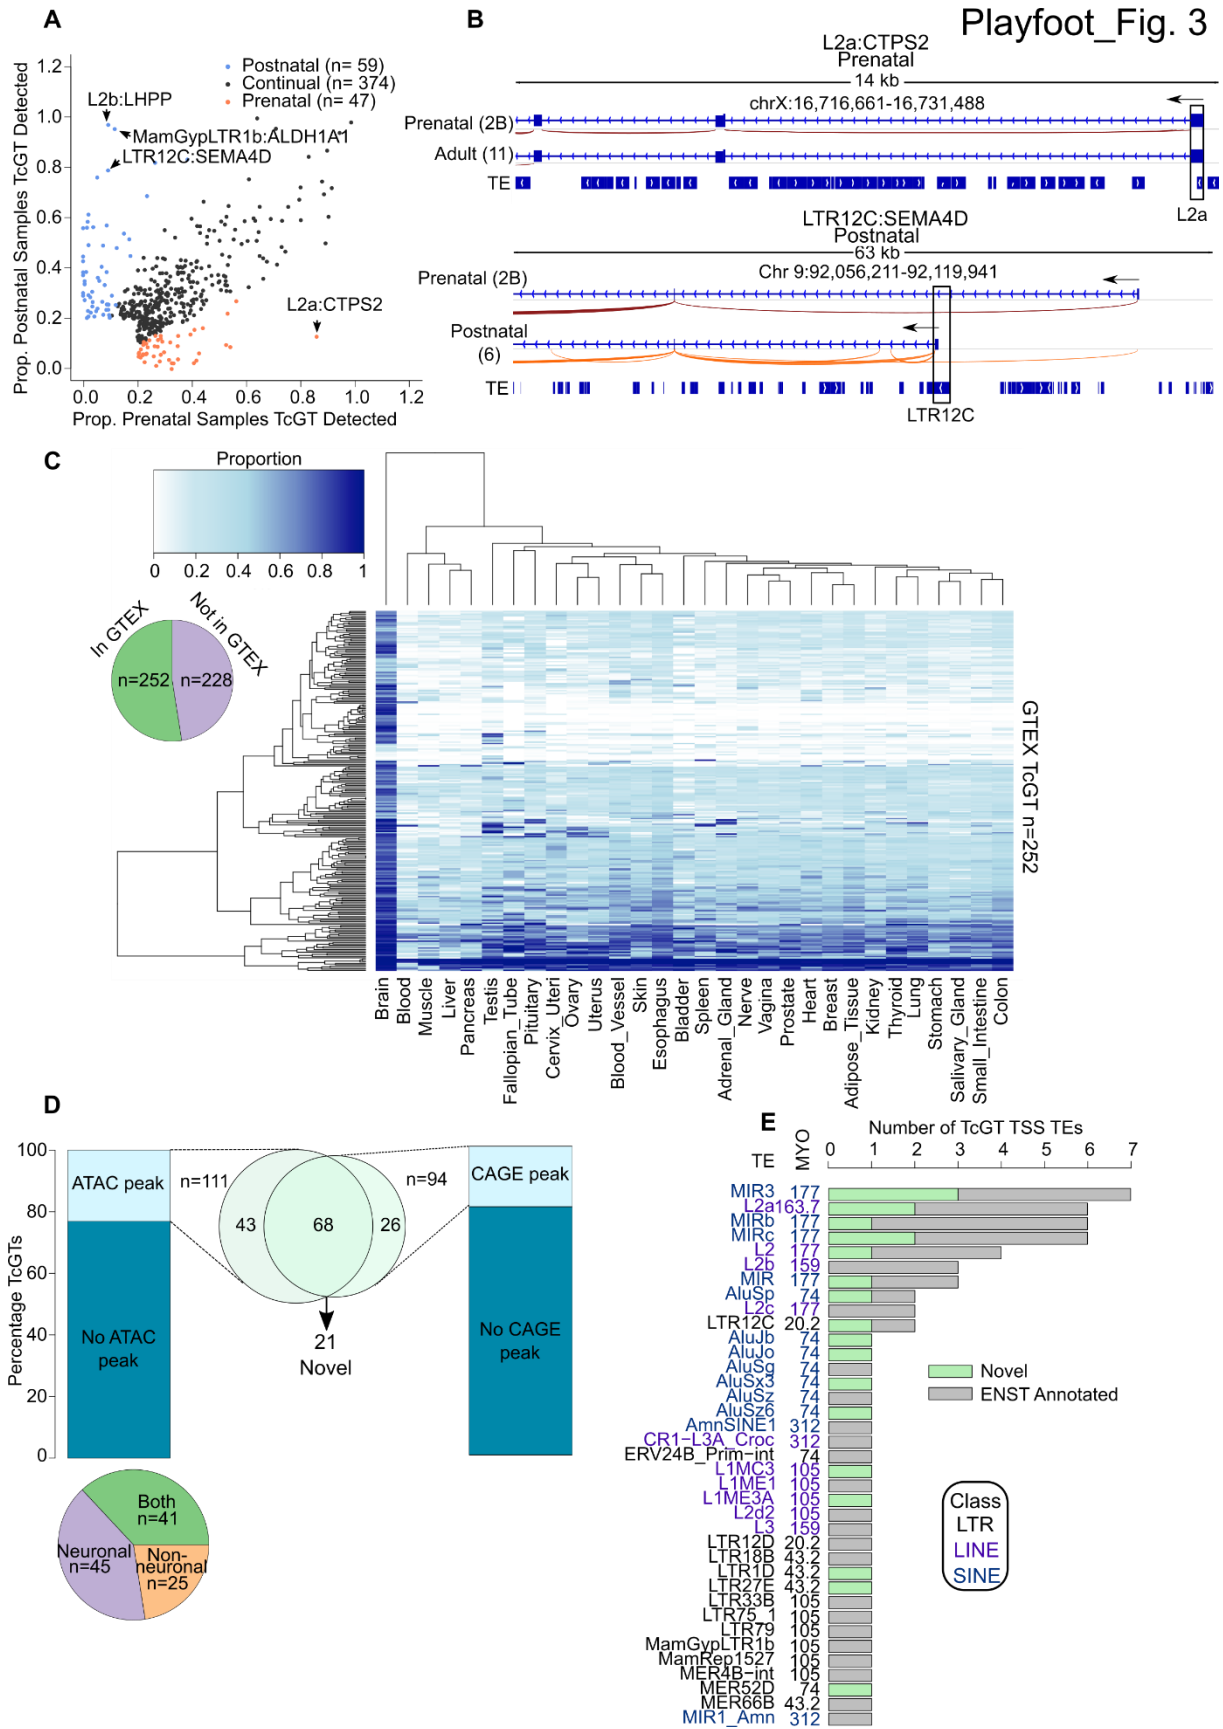

253

254

255 **Figure 3. TE co-option as genic promoters drives spatiotemporal gene expression in human**  
256 **neurogenesis.** (A) Dot plot showing the proportion of pre or postnatal samples TcGTs were detected  
257 in and behaving similarly in both datasets (prenatal, postnatal or continual). (B) Sashimi browser plots  
258 from IGV showing the splicing events in representative samples for prenatal enriched TcGT L2a:CTPS2  
259 and the postnatal enriched LTR12C:SEMA4D. (C) Heatmap indicating the proportion of samples per  
260 GTEX tissue each TcGT from A was detected in. Each row represents an individual TcGT and each  
261 column a different tissue. (C inset) Pie chart indicating the proportion of neurodevelopmental TcGTs  
262 detected in GTEX. (D) Stacked barplot indicating the proportion of TcGT TE TSS loci overlapping an  
263 ATAC-seq peak from BOCA (left) and a pie chart indicating their cell type distribution (bottom left).  
264 Stacked barplot (right) indicating the proportion of TcGT TE TSS loci overlapping a FANTOM5 defined  
265 CAGE peak. Pie chart (centre) showing the overlap of ATAC-seq and CAGE peak associated TcGTs and  
266 highlighting 21 novel, non-ENSEMBL annotated transcripts. (E) Stacked barplots indicating the TE  
267 subfamily, TE class, TE age and the ENSEMBL overlap of each TcGT TE TSS loci. See also Supplemental  
268 Table 9 for all TcGT information.

269

270 specificity, either to neurons (40.5%, 45/111) or to non-neuronal cells (22.5% 25/111), whereas a third  
271 (41/111) were present in both cell subsets (Fig. 3D; Supplemental Table 9). These cell-restricted  
272 patterns were generally independent of the brain region considered, as illustrated by two postnatal  
273 enriched TcGTs, the non-neuronal L2-driven *Dysferlin* (*DYSF*) (Supplemental Fig. S4A), a gene mutations  
274 of which are associated with limb girdle muscular dystrophy 2B (Bashir et al. 1998; Liu et al. 1998), and  
275 the neuronal L2a-driven *Potassium Voltage-Gated Channel Subfamily A Regulatory Beta Subunit 2*  
276 (*KCNAB2*) encoding a regulator of neuronal excitability (McCormack et al. 2002) (Supplemental Fig.  
277 S4B).

278 To confirm that transcription of the TcGTs detected in the developing human brain was starting at the  
279 identified TE, we intersected their TSS with CAGE (cap analysis of gene expression) peaks previously  
280 defined in around 1,000 human cell lines and tissues by the FANTOM5 consortium (Forrest et al. 2014;  
281 Lizio et al. 2015). About a fifth of the TcGTs TSS (19.5%, 94/480) overlapped with CAGE peaks, of which  
282 68 also corresponded to ATAC-seq peaks, providing a subset of high confidence TE-derived TSS loci  
283 driving gene transcription in the developing brain (Fig. 3D; Supplemental table 9). Of these, 21 were  
284 not annotated in ENSEMBL (Fig. 3D; Supplemental table 9), indicating that co-opted TEs acting as  
285 promoter elements are contributing to a previously undetected TE-derived neurodevelopmental  
286 transcription network.

287 We concentrated deeper analyses on the 68 high confidence brain developmental TcGTs. Thirty-seven  
288 different TE subfamilies accounted for their promoters but MIRs and L2s, belonging respectively to the  
289 SINE and LINE families, contributed almost half, perhaps due in part to their high prevalence in the  
290 genome (MiR3 and L2a: 87,870 and 166,340 integrants, respectively) (Fig. 3E), and LTRs about a fifth.  
291 A large range of evolutionary ages were represented, from the ~20 myo (million year old) LTR12C to  
292 the ~177 myo MIRs and L2s.

293 Of these 68 high-confidence TcGTs, 38.2% (26/68) were postnatal-specific, 51.5% (35/68) were  
294 continually detected and 10.3% (7/68) were prenatal-restricted (Fig. 4A). Furthermore, the 5' end of  
295 these TcGTs coincided with ATAC-seq peaks from neurons in 26.5% (18/68), from non-neuronal cells  
296 in 22% (15/68), and from both in 51.5% (35/68) of cases (Fig. 4A). Some TcGTs were present in all brain  
297 regions, whereas others exhibited regional specificity (Supplemental Fig. S5A). For example,  
298 L2:DDRKG1 and L2a:KCNA2, among others, were detected both postnatally and in a higher proportion  
299 of neocortex regions compared to the cerebellum (Fig. 4A; Supplemental Fig. S5A). We next aimed to  
300 determine if the detected TcGTs had the capacity to code for protein. Importantly, *in silico* prediction  
301 of the protein coding potential of these TcGTs, found that about half (31/68) likely encoded the  
302 canonical protein sequence and a fifth (15/68) an N-truncated isoform, while other configurations (N-  
303 terminal addition, C- or N- and C-truncation) were less frequent (Fig. 4A; Supplemental Table 9).

304 To estimate the relative contribution of the TE and non-TE promoters to the expression of the 68 genes  
305 involved in high confidence TcGTs, we compared their transcription levels in samples where the TcGT  
306 was or was not detected (Fig. 4B). In some cases, the TcGT was associated with higher levels of gene  
307 expression in a temporal manner such as the postnatally detected L2a:KCNA2 (top) and most  
308 strikingly MamGypLTR1b:ALDH1A1 (top mid), compared to their non-TE-driven counterparts (Fig. 4B).  
309 The continually detected, non-neuronal LTR33B:ZNF317 (bottom mid) was associated with high  
310 expression throughout brain development, suggestive of a constitutive TE derived promoter.  
311 Conversely, some TcGTs were associated with higher prenatal expression, such as with L2a:CTPS2



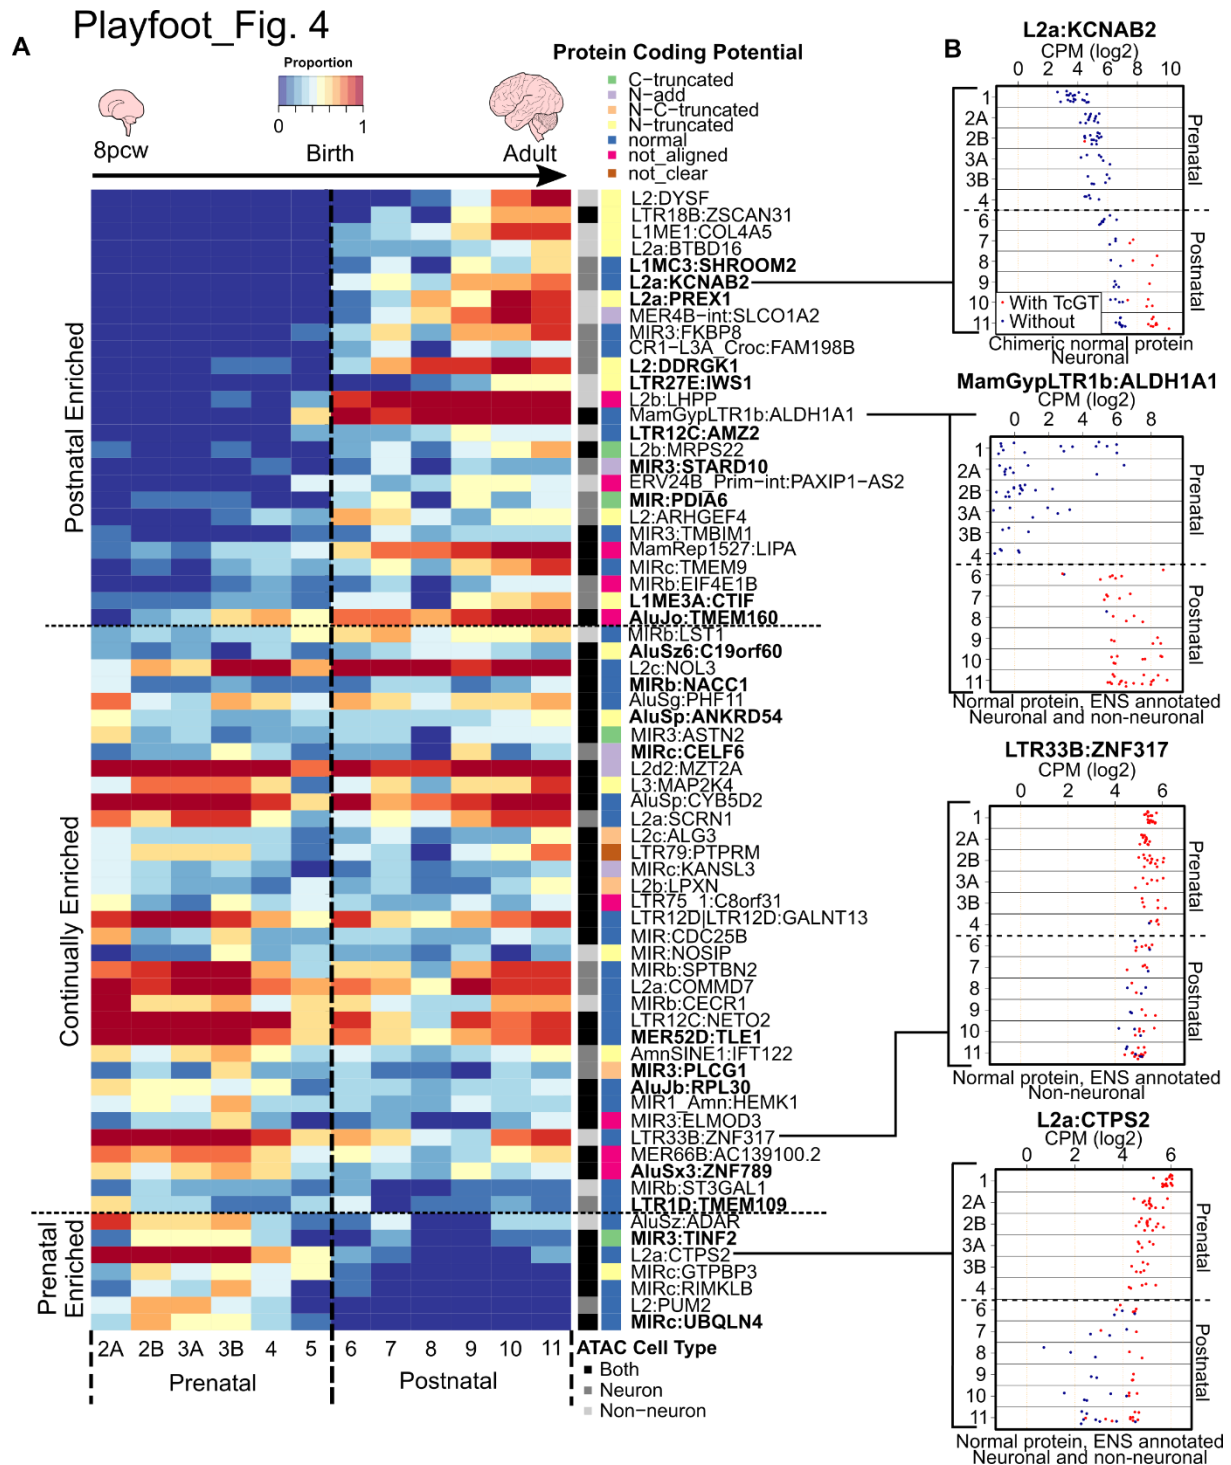

312

313 **Figure 4. TcGTs are temporally expressed throughout neurogenesis in a cell type specific manner,**  
 314 **exhibit protein coding potential and drive transcript expression.** (A) Heatmap showing the proportion  
 315 of samples per developmental stage the 68 TcGTs (from Fig. 3D) were detected in the Brainspan  
 316 dataset, alongside their ATAC-seq cell type overlaps and protein coding potential determined via *in*  
 317 *silico* translation. Bold indicates novel transcripts not annotated in ENSEMBL. See also Supplemental  
 318 Table 9. (B) Dot plots showing the gene expression level per stage for the specified gene for samples  
 319 where the TcGT was detected (red) and where it was not (blue) from Cardoso-Moreira dataset as  
 320 comparison to (A). Dashed line represents birth at stage 6.



321

322 (bottom), while for other genes there were more moderate expression differences in samples with  
323 and without TcGT detection as seen for the postnatally detected neuronal TcGT L2:DDRKG1  
324 (Supplemental Fig. S5B).

### 325 **Experimental validation of brain-detected TcGTs**

326 To verify that the TE and genic exon belonged to the same mRNA transcript, we next aimed to  
327 experimentally confirm TcGT candidates in the SH-SY-5Y neuroblastoma cell line. Using qRT-PCR  
328 primers within the TE TSS and subsequent genic exon, we detected appreciable expression of TcGTs in  
329 this cell system (Supplemental Fig. S6A). However, this did not formally demonstrate that transcription  
330 was driven by the TE. To address this point, we targeted a CRISPR-based activation system (CRISPRa)  
331 to the TSS region of TcGTs in 293T cells (Chavez et al. 2015) (Fig. 5A). We picked candidates based on  
332 the ease of gRNA design and the potential mechanistic or biological relevance of their protein product.  
333 We selected three anti-sense L2-driven, cell type-specific TcGTs predicted to encode for proteins  
334 involved in brain development: KCNAB2, DYSF and DDRGK1, the first in its canonical protein isoform  
335 and the other two as N-truncated isoforms. Activation of each of these three TcGTs could be induced  
336 with the CRISPRa system, confirming that they were indeed driven by their respective TE promoters  
337 (Fig. 5A).

### 338 **TcGT-encoded protein isoforms can display differential subcellular localisation**

339 Having noted that 22% of high-confidence TcGTs were predicted to encode N-truncated proteins (Fig.  
340 4A), we hypothesised that this could, in some cases, result in derivatives deprived of important  
341 subcellular localization domains, such as the endoplasmic reticulum (ER)-targeting N-terminal signal  
342 peptide. We focused on L2:DDRKG1 as it was enriched postnatally, neuron-specific, not annotated in  
343 ENSEMBL and experimentally validated by our 293T-based CRISPRa experiment (Fig. 4A; Fig. 5A;  
344 Supplemental Fig. S6B; Supplemental Table 9). GWAS studies have also identified a DDRGK1 associated  
345 risk locus for Parkinson's disease (Nalls et al. 2014; Chang et al. 2017). The canonical DDRGK1 protein

346 product is anchored to the ER membrane by an N-terminal 27 amino acid signal peptide (Fig. 5B) and  
347 plays a role in ER homeostasis and ER-phagy (Liang et al. 2020; Liu et al. 2017). In the predicted  
348 translated product of the L2:DDRKG1 TcGT, the signal peptide is replaced by a 10 amino acid L2-  
349 encoded sequence, conserved in new-world primates, but harboring non-synonymous substitutions in  
350 old-world primates (Fig. 5B; Supplemental Fig. S7A). Of note, this L2 integrant is absent in mice  
351 (Supplemental Fig. S7A). Furthermore, the L2:DDRKG1 TcGT is detected in the Rhesus Macaque  
352 developing brain with the same prenatal to postnatal expression dynamics as in humans (Supplemental  
353 Fig. S7B & C). We therefore transfected HEK293T cells with plasmids expressing HA-tagged versions of  
354 either the canonical “wild-type” (WT) DDRGK1 transcript or its TcGT counterpart and examined the  
355 subcellular localization of the resulting proteins by indirect immunofluorescence (Fig. 5C) and by  
356 cellular fractionation followed by western blotting (Fig. 5D). Confocal microscopy revealed that  
357 WT:DDRGK1-HA largely co-localized with BIP, an ER membrane marker, while L2:DDRGK1-HA displayed  
358 a diffuse cytosolic pattern (Fig. 5C). Cellular fractionation further confirmed that the WT DDRGK1  
359 isoform was sequestered in the membrane fraction, whereas the L2:DDRGK1 counterpart was  
360 enriched in cytosol (Fig. 5D).

361 As N-truncated isoforms made up the largest category of *in-silico* predicted TcGT products besides full-  
362 length proteins, we next asked how widespread this type of TE-induced protein re-localisation might  
363 be. For this, we intersected a database of signal peptide-containing proteins with our initial list of 480  
364 TcGT-encoded protein products (Fig. 5E; Supplemental Table 9). Of 94 TcGT products predicted to be  
365 N-truncated, 12 contained a putative signal peptide in the canonical isoform. This prediction was  
366 supported in 11 cases *in silico* by signalP 5.0 (Almagro Armenteros et al., 2019), which predicted that  
367 in all of these instances the TcGT isoforms lacked this putative signal peptide (Supplemental Fig. S8).  
368 Therefore, subcellular re-targeting may be a frequent consequence of TE-driven protein innovation.

369

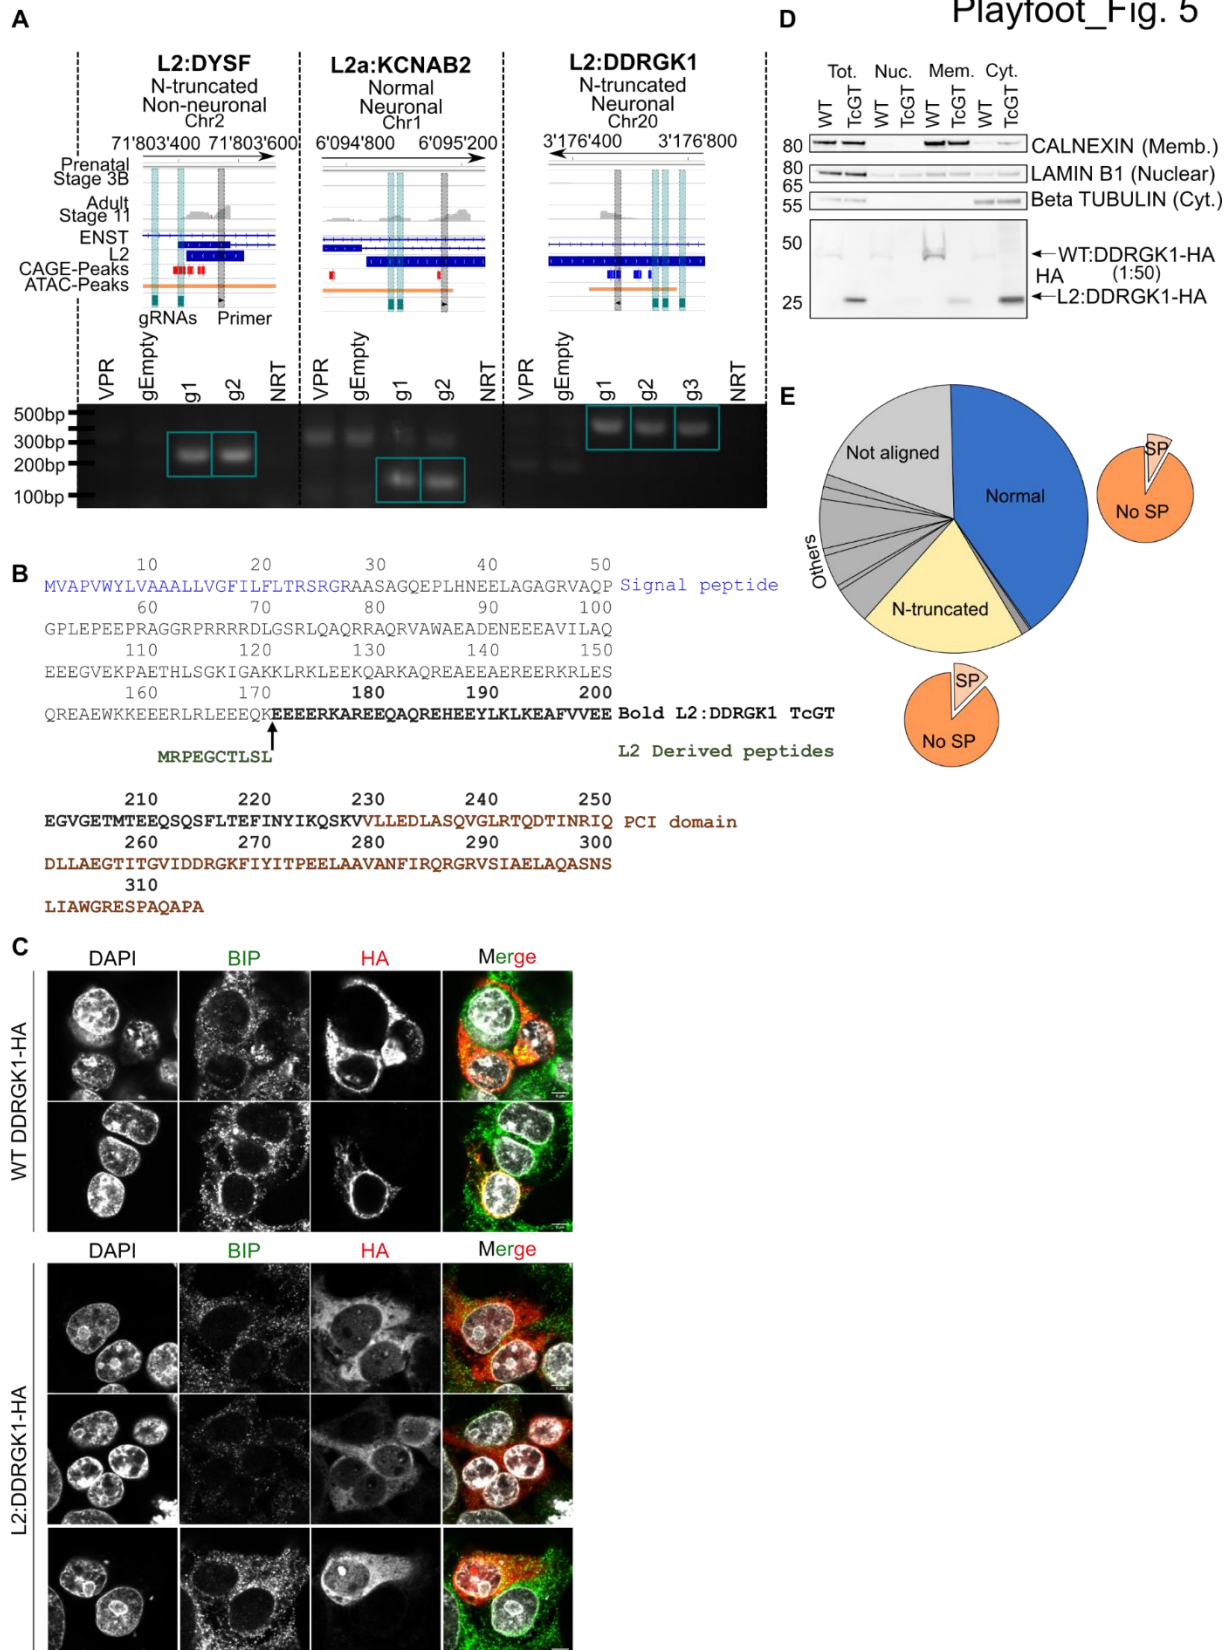

373 **Figure 5. Antisense L2 elements directly drive TcGTs and contribute to chimeric protein formation**  
374 **and cytosolic re-localisation of the ER-membrane associated DDRGK1.** (A) Schematic of TcGT TE TSS  
375 loci for indicated genes and representative prenatal (stage 3B) and adult (stage 11) RNA-seq tracks.  
376 Their associated protein coding potential and cell type specificity are highlighted and CAGE peak loci  
377 (red sense strand, blue anti-sense strand), CRISPRa gRNAs (green vertical bar) and TE associated PCR  
378 primers are shown (black vertical bar) (top). RT-PCR on cDNA generated from HEK293T cells transiently  
379 transfected with dCAS9-VPR plasmid and individual gRNA plasmids containing sequences targeting the  
380 TcGT TE TSS loci denoted in the schematic. dCAS9-VPR (VPR) or empty gRNA plasmids (gEmpty) alone  
381 were used as controls. Green box indicates bands of correct PCR product size absent in controls. NRT=  
382 no reverse transcriptase. (B) Canonical DDRGK1 and TcGT L2:DDRGK1 derived protein sequence. (C)  
383 Overexpression of canonical WT DDRGK1-HA and L2:DDRGK1-HA in HEK293T cells followed by  
384 immunofluorescent staining for BIP (an ER-membrane associated protein) and HA tag, followed by  
385 confocal imaging (scale bar = 5µm). (D) Overexpression of canonical DDRGK1-HA (WT) and L2:DDRGK1-  
386 HA (TcGT) in HEK293T cells followed by cellular fractionation and western blot for the indicated marker  
387 proteins (right of western blot) and HA tag. For WT DDRGK1 50x less protein lysate compared to  
388 L2:DDRGK1 was loaded for the HA blot due to high levels of protein expressed. Image is representative  
389 of two independent experiments. (E) Pie charts showing the *in silico* protein coding potential of the  
390 480 TcGTs identified in Fig. 3A with the proportion containing a signal peptide shown with the orange  
391 pie charts. See also Supplemental Table 9.

392

## 393 Discussion

394 An increasing number of studies are aimed at unravelling the transcriptional dynamics of human  
395 neurogenesis (Li et al. 2018; Cardoso-Moreira et al. 2019; Keil et al. 2018), yet, so far, little attention  
396 has been paid to the participation of TEeRS in this process. While retrotransposition of L1HS elements  
397 has been suggested to contribute to neuronal plasticity, experimental support for this model is lacking,  
398 and the vast majority of TEs hosted by the human genome have long lost the ability to spread (Muotri  
399 et al. 2005; Brouha et al. 2003). This prompted us to hypothesise that TEs might exert far greater  
400 influences on brain development through their ability to shape gene expression. As a first step towards  
401 testing this model, we analysed two independent human neurogenesis RNA-seq datasets with a 'TE  
402 centric' approach. This led us to uncover that the transposcriptome undergoes profound changes at  
403 each stage of brain development, with the expression of individual TE subfamilies largely anti-  
404 correlating to that of their cognate KZFP controllers. Strikingly, KZFP genes were globally  
405 downregulated at postnatal versus prenatal stages, coincident with the upregulation of their TE  
406 targets. Recent indications from an analysis of TEs resistant to loss of DNA methylation during the wave

407 of epigenetic reprogramming in human primordial germ cells (hPGCs) showed modest anti-correlations  
408 of KZFPs and their target TE subfamilies in prenatal neurogenesis (Dietmann et al. 2020). The proposal  
409 that KZFPs may mediate the exaptation of TEs as developmental enhancers marked in hPGCs is  
410 intriguing and, combined with our analyses, suggests a multifaceted KZFP and TE mediated  
411 spatiotemporal transcriptional network, not only in prenatal stages but also highly prevalent after  
412 birth, with TEeRS playing important roles as alternative promoters, in addition to enhancers,  
413 throughout. Indeed, correlative expression studies on genic KZFP targets suggest that KZFPs may also  
414 directly regulate gene promoters during human neurogenesis independently from their TE binding  
415 ability (Farmiloe et al. 2020), and KZFPs were amongst genes previously found to be most differentially  
416 expressed between the chimpanzee and human brain (Nowick et al. 2009). Increasing evidence also  
417 supports a regulatory role for KZFP-targeted TEs in this and other developmental contexts (Ecco et al.  
418 2016, 2017; Chen et al. 2019; Pontis et al. 2019; Turelli et al. 2020). For example, we recently  
419 demonstrated that two primate-restricted KZFPs, ZNF417 and ZNF587, control the expression of  
420 neuronal genes such as *PRODH* and *AADAT* via the regulation of HERVK-based TEeRS (Turelli et al.  
421 2020). Furthermore, studies on the transcriptional co-repressors KAP1 and DNMT1 in hNPCs have  
422 highlighted their roles in the regulation of TEs and secondarily of cellular genes (Brattås et al. 2017;  
423 Jönsson et al. 2019). However, *in vitro* models do not recapitulate the global spatiotemporal  
424 complexity of gene and TE expression in the brain, nor its diverse cell type milieu throughout  
425 development, hence the interest of performing large scale ‘TE centric’ bioinformatics analyses on large  
426 post-mortem brain RNA-seq datasets.

427 De-repression of TEs, specifically of the LTR class, has been associated with various neurological  
428 disorders such as amyotrophic lateral sclerosis (ALS), Alzheimer’s disease (AD) and multiple sclerosis  
429 (MS) (Tam et al. 2019; Jönsson et al. 2020). The upregulation of LTR class elements in adult versus early  
430 prenatal brain is intriguing, as it suggests that LTR transposcription *per se* is a developmentally  
431 regulated feature of neurogenesis, which when deregulated is associated with a disease state. We  
432 propose that increased postnatal TE expression may possibly be reflective of the development of cell

433 types not present in early prenatal stages, such as astrocytes, microglia and oligodendrocytes, the  
434 developmental and transcriptional trajectories of which were identified by scRNA-seq analyses (Li et  
435 al. 2018). To determine the transposcriptome in scRNA-seq data remains technically challenging  
436 because many TE-derived transcripts are lowly abundant, a limitation that will hopefully be alleviated  
437 by progress in sequencing techniques and computational approaches (Linker et al. 2020). Of note, TEs  
438 heavily contribute to long non-coding RNAs (lncRNAs), which are abundant in the human brain (Derrien  
439 et al. 2012; Kelley and Rinn 2012; Zimmer-Bensch 2019). It is plausible that upregulated TE transcripts  
440 play a role in this context, thereby exerting not cis- but trans-acting influences, the identification of  
441 which is far more challenging.

442 One increasingly well-characterised aspect of TE co-option is the engagement of TEeRS as alternative  
443 promoters. A wide range of oncogene-encoding TE-driven TcGTs have been documented in recent  
444 surveys of cancer databases (Jang et al. 2019; Attig et al. 2019), but the role of these transcript variants  
445 in physiological conditions remains largely undefined. Tissue-specific TcGTs have also been detected  
446 in the mouse developing intestine, liver, lung, stomach and kidney (Miao et al. 2020). Here, we  
447 demonstrate not only the spatially and temporally orchestrated expression of TcGTs in the developing  
448 human brain, but also that these TcGTs are largely organ- and cell type-specific. Some of them appear  
449 to be solely responsible for the expression of the involved gene, whereas others were present  
450 alongside canonical non-TE-driven transcripts, indicating sophisticated levels of regulation.

451 By experimental activation of a selected subset of antisense L2-driven TcGTs with CRISPRa and  
452 functional analyses of the product of the L2:DDR GK1 transcript, we highlight the functional relevance  
453 of this phenomenon for human neurogenesis. DDR GK1 is an ER membrane-associated protein with  
454 critical roles in UFMylation, an ubiquitin-like modification, and is involved in the unfolded protein  
455 response and ER-phagy (Liu et al. 2017; Liang et al. 2020). DDR GK1 is essential to target interactors like  
456 UFL1, the UFMylation ligase, to the ER membrane. The novel cytosolic chimeric L2:DDR GK1 protein,  
457 where a short N-terminal sequence derived from the L2 integrant replaces the signal peptide

458 characteristic of its canonical counterpart, may therefore exert novel functions in the cytosol of  
459 postnatal to adult neurons. As signal peptide excision seems to affect a number of other TcGT products,  
460 this example may illustrate a more general phenomenon, whereby TE-driven genome evolution  
461 generates novel protein isoforms altering critical cell functions.

462 Our study indicates that the exaptation of TE-embedded regulatory sequences and its facilitation by  
463 TE-targeting KZFP controllers have significantly contributed to the complexity of transcriptional  
464 networks in the developing human brain. This warrants efforts aimed at delineating the evolutionary  
465 and functional impact of this phenomenon, and at defining how its alterations, notably in the context  
466 of inter-individual differences at these genomic loci, translates into variations in brain development,  
467 function and disease susceptibility.

## 468 **Methods**

### 469 **Datasets**

470 Raw RNA-seq fastq files for human and Rhesus macaque brain development (Cardoso-Moreira et al.  
471 2019) were downloaded from the European Nucleotide Archive (datasets PRJEB26969 and  
472 PRJEB26956, respectively).

473 Raw RNA-seq fastq files for the GTEX and Brainspan (phs000424.v7.p2, phs000755.v2.p1), were  
474 downloaded from the dbGaP authorized access platform. Processed bed files containing regional  
475 neuronal or non-neuronal ATAC-seq peak loci from the Brain Open Chromatin Atlas (Fullard et al. 2018)  
476 were downloaded for hg19. To generate consensus neuronal and non-neuronal ATAC-peak bed files,  
477 bed coordinates from all regions were combined and overlapping peak coordinates merged using  
478 bedtools merge. Processed bed files for CAGE-seq peak loci from FANTOM5 (Forrest et al. 2014) were  
479 downloaded for hg19 (Lizio et al. 2015). Signal peptide containing proteins in human were downloaded  
480 from <http://signalpeptide.com/index.php>. Processed bed files from KZFP ChIP-exo experiments were  
481 used from our previous study (Imbeault et al. 2017).



## 482 RNA-seq analysis

483 Reads were mapped to the human (hg19), or macaque (rheMac8) genome using hisat2 (Kim et al.  
484 2015) with parameters hisat2 -k 5 --seed 42. Counts on genes and TEs were generated using  
485 featureCounts (Liao et al. 2014). To avoid read assignment ambiguity between genes and TEs, a gtf file  
486 containing both was provided to featureCounts. For repetitive sequences, an in-house curated version  
487 of the Repbase database was used (fragmented LTR and internal segments belonging to a single  
488 integrant were merged), generated as previously described (Turelli et al. 2020). Minor modifications  
489 to the repeat merging pipeline described in Turelli et al., 2020 were made for Macaque (RepeatMasker  
490 4.0.5 20160202) with the distance between two LTR elements of the same orientation to an ERV-int  
491 fragment being less than 400bp. For genes the ensemble release 75 annotation was used. Only  
492 uniquely mapped reads were used for counting on genes and TEs with the command 'featureCounts -  
493 t exon -g gene\_id -Q 10'. For the Brainspan dataset, samples with less than 10 million unique mapped  
494 reads on genes were discarded from the analysis. TEs that did not have at least one sample with 50  
495 reads or overlapped an exon were discarded from the mapping TE integrant analysis. For estimating  
496 TE subfamilies expression level, reads were summarized using the command featureCounts -M --  
497 fraction -t exon -g gene\_id -Q 0 then, for each subfamily, counts on all TE members were added up. As  
498 the Cardoso-Moreira et al., 2019 RNA-seq was stranded data, reads on both strands were combined  
499 for TEs to facilitate comparison to the non-stranded Brainspan dataset. Normalization for sequencing  
500 depth was done for both genes and TEs using the TMM method as implemented in the limma package  
501 of Bioconductor (Gentleman et al. 2004) and using the counts on genes as library size. Differential gene  
502 expression analysis was performed using voom (Law et al. 2014) as it has been implemented in the  
503 limma package of Bioconductor (Gentleman et al. 2004). A gene (or TE) was considered to be  
504 differentially expressed when the fold change between groups was greater than two and the p-value  
505 was smaller than 0.05. A moderated t-test (as implemented in the limma package of R) was used to  
506 test significance. P-values were corrected for multiple testing using the Benjamini-Hochberg's method  
507 (Benjamini and Hochberg 1995). Temporal expression correlation analyses of individual genes, TE

508 integrants or subfamilies were performed between Brainspan and Cardoso datasets using the  
509 ‘Pearson’ method. For inter-regional correlations within the Brainspan dataset, only expressed genes  
510 or TEs common to all regions were considered. Bam files and sashimi plots were visualised using the  
511 Integrative Genomics Viewer (Katz et al. 2015; Robinson et al. 2011).

### 512 **TcGT detection pipeline**

513 First, a per sample transcriptome was computed from the RNA-seq bam file using Stringtie (Kovaka et  
514 al. 2019) with parameters `-j 1 -c 1`. Each transcriptome was then crossed using BEDTools (Quinlan and  
515 Hall 2010), to ensembl hg19 (or rheMac8) coding exons and curated RepeatMasker to extract TcGTs  
516 with one or more reads spliced between a TE and genic exon for each sample. Second, a custom python  
517 program was used to annotate and aggregate the sample level TcGTs into counts per stages (defined  
518 in Supplemental Fig. S1B). In brief, for each dataset, a GTF containing all annotated TcGTs was created  
519 and TcGTs having their first exon overlapping an annotated gene, or TSS not overlapping a TE were  
520 discarded. From this filtered file, TcGTs associated with the same gene and having a TSS within 100bp  
521 of each other were aggregated. Finally, for each aggregate, its occurrence per group was computed  
522 and a consensus transcript was generated for each TSS aggregate. For each exon of TcGT aggregate,  
523 its percentage of occurrence across the different samples was computed and integrated in the  
524 consensus if present in more than 30% of the samples the TcGT was detected in. All samples available  
525 in both datasets were used regardless of mapped read count.

526 From the resulting master file, additional criteria were applied to determine prenatal, postnatal or  
527 continually expressed TcGTs. 1. Only TcGTs that were present in at least 20% of prenatal, postnatal or  
528 20% of both pre and postnatal samples (continual) were kept for each dataset. 2. To ensure TcGTs  
529 were robustly detectable in the different datasets, TcGT files were merged based on the same TSS TE  
530 and associated gene name. 3. TcGTs were required to exhibit the same temporal transcriptional  
531 behaviour in both datasets. I.E a 2 fold change in TcGT detection pre vs postnatal and vice versa or a  
532 lower fold change in both datasets (continual). This resulted in the 480 robustly detectable temporal

533 TcGTs in Fig. 3A and Supplemental Table 9. These TcGTs were further filtered for strong promoter  
534 regions using a Bedtools intersect of the 200bp up and downstream of the TcGT TSS with FANTOM5  
535 CAGE-seq (Forrest et al. 2014) and BOCA neuronal and non-neuronal consensus ATAC-seq peak bed  
536 files (Fullard et al. 2018). TcGT TSS loci were also intersected with ENSEMBL (GRCh37.p13)  
537 transcriptional start sites to determine non-annotated transcripts.

### 538 **Protein product prediction**

539 DNA sequences were retrieved for each TcGTs consensus and protein products were derived from the  
540 longest ORF in the three reading frames using biopython (Cock et al. 2009). The resulting translation  
541 products were aligned against the protein sequence of the most similar cognate gene isoforms (exons  
542 intersect between TcGTs and each gene isoform) and classified into several categories. Proteins with  
543 no alignment for any isoform were classified as out-of-frame, therefore not clear or not aligned. In-  
544 frame peptides were further classified according to their N-terminal modifications: Normal, TcGT ORF  
545 peptides align perfectly with cognate ORF peptides; N-add, TcGT ORF peptides encode novel in-frame  
546 N-terminal amino acids followed by the full length cognate protein sequence; N-truncated, TcGT ORF  
547 peptides lack parts of the cognate N-terminal protein sequence and might contain novel in-frame N-  
548 terminal amino acids. TcGTs that we could not clearly classify were grouped in the 'other' category,  
549 such as TcGTs including C-terminal modifications. If the classification was ambiguous for different  
550 protein isoforms, the normal category was always privileged.

### 551 **TE and KZFP age estimation**

552 TE subfamily ages were downloaded from DFAM (Hubley et al. 2016). To compare KZFP ages we  
553 developed a score we called Complete Alignment of Zinc Finger (CAZF) (as we described in Thorball et  
554 al. 2020), which rely on the alignments of zinc finger domains, using only the four amino acid  
555 presumably touching DNA. Briefly, alignment scores made with BLOSUM80 matrix were used,  
556 normalised by the 'perfect' alignment score (alignment against itself) and by the length of the

557 alignment. To compute an age for KZFPs, we relied on inter-species clusters of KZFPs made with CAZF  
558 score. KZFPs with CAZF>0.5 were clustered together, using a bottom-up approach. The divergence time  
559 between human and the farthest species present in the cluster was used as the age of individual KZFPs  
560 in the cluster. Multiz alignments for L2:DDRKG1 locus were extracted from the UCSC genome browser

#### 561 **Cell culture**

562 Human embryonic kidney 293T (HEK293T) cells and SH-SY-5Y neuroblastoma cells were cultured in  
563 DMEM supplemented with 10% fetal calf serum and 1% penicillin/streptomycin.

#### 564 **Transfection**

565 Transient transfection of HEK293T cells was performed with FuGENE HD (Promega) as per the  
566 manufacturer's recommendation. Cells were harvested 48 hours after transfection for either RNA  
567 extraction or immunofluorescence.

#### 568 **CRISPRa**

569 The SP-dCas9-VPR (Addgene 63798) (Chavez et al. 2015) and the gRNA cloning vector (Addgene 41824)  
570 (Mali et al. 2013) were gifts from George Church. gRNAs were designed with CRISPOR (Concordet and  
571 Haeussler 2018), using input DNA sequence 50 to 300bp upstream of the TE resident CAGE peak and  
572 the most 5' location of RNA-seq reads mapping to the TcGT TE TSS loci. Multiple gRNAs were selected  
573 for each TcGT to control for gRNA specific effects and increase experimental robustness. gRNA  
574 oligonucleotides were synthesised (Microsynth) with the recommended overhangs (Supplemental  
575 Table 10) for integration into the gRNA cloning vector (Mali et al. 2013). gRNA oligonucleotides were  
576 annealed and extended using Phusion High Fidelity DNA polymerase master mix (NEB) with thermal  
577 cycling conditions of 98°C two minutes (1x), 98°C 10 seconds + 72°C 20 seconds (3x) and 72°C for five  
578 minutes. 10µg of SP-dCas9-VPR was digested with Af1II (NEB) in CutSmart buffer for two hours at 37°C,  
579 followed by gel electrophoresis and purification of the correct sized band of linearised plasmid with  
580 E.Z.N.A Gel Extraction Kit (Omega Bio-tek). The resulting linearised plasmid and double stranded

581 oligonucleotides were ligated using Gibson Assembly Master Mix (NEB) as per manufacturer's  
582 recommendations. The resulting gRNA containing plasmid was transformed into HB101 chemically  
583 competent *E.coli*, with colonies containing the transformed plasmid selected on agar plates containing  
584 kanamycin, followed by colony picking for growth in kanamycin agar broth followed by GeneJET  
585 Plasmid Miniprep (ThermoFisher). gRNA plasmids were Sanger sequenced to detect the correct  
586 insertion of specific gRNA sequences. 300,000 HEK293T cells were seeded per well of a six well plate.  
587 24 hours later, co-transfection was performed with 1µg each of SP-dCas9-VPR and TcGT targeting gRNA  
588 containing gRNA cloning vector. SP-dCas9-VPR or empty gRNA cloning vector alone were transfected  
589 as non-targeting controls. Cells were harvested for RNA 48 hours post-transfection.

#### 590 **RT-PCR and qRT-PCR**

591 Primers to detect TcGTs were designed with Primer3 (Untergasser et al. 2012) by inputting DNA  
592 sequences covering and flanking the splice junction between the TE and genic exon (Supplemental  
593 Table 10). One primer was required to be present in the TE sequence where RNA-seq reads were  
594 detected downstream of a CAGE-peak, whilst the other was present in the first or second genic exon.  
595 BLAT (Kent 2002) of primer sequences against the human genome ensured only uniquely mapping  
596 primers were used. RNA was extracted from cells using the NucleoSpin RNA mini kit (Macherey-Nagel)  
597 with on-column deoxyribonuclease treatment. 1ug RNA was used in the cDNA synthesis reaction with  
598 the Maxima H minus cDNA synthesis master mix (ThermoFisher) and RT-PCR was performed with  
599 Phusion High Fidelity DNA polymerase master mix (NEB) each with the manufacturer recommended  
600 PCR thermal cycles, on a 9800 Fast Thermal Cycler (Applied Bioscience). PCR products were visualised  
601 by 1.5% agarose gel electrophoresis stained with SYBR Safe DNA gel stain (ThermoFisher) and imaged  
602 with a BioDoc-It imaging system (UVP). Bands of the correct size were excised, gel purified with E.Z.N.A  
603 Gel Extraction Kit (Omega Bio-tek) and Sanger sequenced using primers used for PCR. The correct PCR  
604 product was confirmed using BLAT (Kent 2002) of the Sanger sequencing results against the human  
605 genome. qRT-PCR was performed with PowerUp SYBR Green Master Mix on a QuantStudio 6 Flex Real-

606 Time PCR system. The standard curve method was used to quantify expression normalised to *BETA*  
607 *ACTIN* with no amplification in the no reverse transcriptase control.

### 608 **Cloning of WT:DDRKG1 and L2:DDRKG1**

609 The WT:DDRKG1 cDNA Clone (Genbank accession:HQ448262 ImageID:100071664) was obtained from  
610 the ORFeome Collaboration (<http://www.orfeomecollaboration.org/>) in the *pENTR223* vector without  
611 a stop codon. The L2:DDRKG1 sequence was PCR amplified with Phusion High Fidelity DNA polymerase  
612 master mix (NEB), using cDNA generated in the L2:DDRKG1 CRISPRa experiment with gRNA 1. This  
613 ensured the *bona fide* L2 driven transcript was cloned. Cloning primers used are shown in  
614 Supplemental Table 10, with the forward primer containing a CACC Kozak sequence and the reverse  
615 primer omitting the stop codon. Thermal cycling conditions were 98°C 30 seconds (1x), 98°C 10 seconds  
616 + 60°C 15 seconds + 72°C 15 seconds (35x) and 72°C for 10 minutes. A 466bp PCR fragment was  
617 extracted after agarose gel electrophoresis, purified with E.Z.N.A Gel Extraction Kit (Omega Bio-tek),  
618 transformed into chemically competent HB101 E.coli, colonies picked and mini-prepped. WT:DDRKG1  
619 and L2:DDRKG1 in the *pENTR* vectors were then shuttled into pTRE-3HA (Imbeault et al. 2017) with the  
620 Gateway LR Clonase II Enzyme mix (ThermoFisher) as per manufacturer's instructions. pTRE-3HA  
621 produces proteins with three C-terminal HA tags in a doxycyclin-dependent manner.

### 622 **Cellular fractionation**

623 Approximately 400,000 HEK293T cells in different wells of a 6 well plate were transfected with either  
624 pTRE-WT:DDRKG1-HA or pTRE-L2:DDRKG1-HA whose expression was induced for 48 hours by adding  
625 1µg/ml doxycycline to the media. After 48 hours wells were washed with 1ml ice cold PBS and cells  
626 were scraped and transferred to Eppendorf tubes on the second wash. After centrifugation at 300rcf  
627 for five minutes at 4°C, PBS was aspirated, cells re-suspended in 400µl ice-cold cytoplasmic isolation  
628 buffer (10mM KOAc, 2mM MgOAc, 20mM HEPES pH7.5, 0.5mM DTT, 0.015% digitonin) and  
629 centrifuged at 900rcf for five minutes at 4°C. Supernatant was collected as the cytoplasmic fraction  
630 and the remaining pellet was re-suspended in 400µl of membrane isolation buffer (10mM HEPES,

631 10mM KCl, 0.1mM EDTA pH8, 1mM DTT, 0.5% Triton X-100, 100mM NaF), then centrifuged for 10  
632 minutes at 900rcf at 4°C to pellet nuclei with the supernatant collected as the membrane fraction.  
633 Pelleted nuclei were resuspended in 400µl of lysis buffer (1% NP-40, 500mM Tris-HCL pH8, 0.05% SDS,  
634 20mM EDTA, 10mM NaF, 20mM benzamidine) for 10 minutes on ice, centrifuged for 10 minutes at  
635 900rcf at 4°C and the supernatant collected as the nuclear fraction. 100µl of 4x NuPAGE LDS sample  
636 buffer (ThermoFisher) was added to the 400µl cellular fractions and samples boiled at 95°C for five  
637 minutes.

### 638 **Western blot**

639 20µl of each cellular fraction was used for SDS-PAGE in a NuPAGE 4-12% Bis-TRIS gel and MOPs running  
640 buffer (ThermoFisher). For subcellular fraction marker proteins, the same amount of lysate was added  
641 from each sample but for the HA blot, pTRE-WT:DDRKG1-HA samples were diluted 1:50 due to high  
642 over-expression levels compared to pTRE-L2:DDRKG1-HA. Proteins were transferred to a nitrocellulose  
643 membrane using an iBLOT 2 dry blotting system (ThermoFisher) and analysed by immunoblotting using  
644 CALNEXIN (Bethyl A303-696A, 1:2000), LAMIN B1 (Abcam ab16048, 1:1000), β TUBULIN (Sigma T4026,  
645 1:1000), HA-HRP conjugated (Roche 12013819001, 1:2000). HRP-conjugated anti-mouse (GE  
646 Healthcare NA931V, 1:10000) and HRP-conjugated anti-rabbit (Santa Cruz sc-2004 1:5000) antibodies  
647 were used where appropriate and the blot was visualised using the Fusion SOLO S (Vilber).

### 648 **Immunofluorescence**

649 HEK293T cells were plated on glass coverslips and immunofluorescence was performed as previously  
650 described (Helleboid et al. 2019) 48 hours post-transfection and expression induction with 1µg/ml  
651 doxycycline for pTRE-WT:DDRKG1-HA or pTRE-L2:DDRKG1-HA. Once 70% confluent, cells were washed  
652 three times with PBS, fixed in ice-cold methanol for 20 minutes at -20°C then washed three more times  
653 with PBS. Cells were blocked with 1% BSA/PBS for 30 minutes and then incubated with antibodies for  
654 HA.11 (BioLegend MMS-101P, 1:2000) and BIP (Abcam ab21685, 1:1000) in 1% BSA/PBS for one hour.  
655 Three washes with PBS were performed, followed by incubation with anti-mouse and anti-rabbit Alexa



656 488 or 568 (ThermoFisher 1:800) for one hour. DAPI (1:10000) was added in the last 10 minutes of  
657 incubation, samples washed three times with PBS and coverslips mounted on slides with ProLong Gold  
658 Antifade Mountant (ThermoFisher). Images were acquired on a SP8 upright confocal microscope  
659 (Leica) and processed in ImageJ.

#### 660 **Data Access**

661 No additional high throughput data was generated in this study.

#### 662 **Acknowledgements**

663 We thank all members of the Trono Lab for helpful and insightful discussions, along with Samuel  
664 Corless and Nezha Benabdallah for critical reading of the manuscript.

#### 665 **Funding**

666 This study was supported by grants from the Personalized Health and Related Technologies (PHRT-  
667 508), the European Research Council (KRABnKAP, #268721; Transpos-X, #694658), and the Swiss  
668 National Science Foundation (310030\_152879 and 310030B\_173337) to D.T.

#### 669 **Author Contributions**

670 C.P. and D.T. conceived the study, interpreted the data, and wrote the manuscript. C.P. performed  
671 bioinformatics analyses and all experiments. J.D. and S.S. developed key code and performed  
672 bioinformatics analyses. S.D. performed the GTEx TcGT analysis and *in silico* translation of TcGTs. A.C.  
673 performed the KZFP aging analysis and determined KZFP TE subfamily targets. E.P. contributed to  
674 bioinformatics tools and code. All authors reviewed the manuscript.

#### 675 **Disclosure Declaration**

676 The authors declare they have no competing interests.

677

## 678 References

- 679 Adam SA, Schnell O, Pöschl J, Eigenbrod S, Kretzschmar HA, Tonn J-C, Schüller U. 2012. ALDH1A1 is a  
680 Marker of Astrocytic Differentiation during Brain Development and Correlates with Better  
681 Survival in Glioblastoma Patients. *Brain Pathol* **22**: 788–797. doi:10.1111/j.1750-  
682 3639.2012.00592.x
- 683 Attig J, Young GR, Hosie L, Perkins D, Encheva-Yokoya V, Stoye JP, Snijders AP, Ternette N, Kassiotis G.  
684 2019. LTR retroelement expansion of the human cancer transcriptome and immunopeptidome  
685 revealed by de novo transcript assembly. *Genome Res* **29**: 1578–1590.  
686 doi:10.1101/gr.248922.119
- 687 Bashir R, Britton S, Strachan T, Keers S, Vafiadaki E, Lako M, Richard I, Marchand S, Bourg N, Argov Z,  
688 et al. 1998. A gene related to *Caenorhabditis elegans* spermatogenesis factor *fer-1* is mutated in  
689 limb-girdle muscular dystrophy type 2B. *Nat Genet* **20**: 37–42. doi: 10.1038/1689
- 690 Benjamini Y, Hochberg Y. 1995. Controlling the False Discovery Rate: A Practical and Powerful  
691 Approach to Multiple Controlling the False Discovery Rate: a Practical and Powerful Approach to  
692 Multiple Testing. *J R Stat Soc* **57**: 289–300. doi:10.1111/j.2517-6161.1995.tb02031.x
- 693 Bourque G, Leong B, Vega VB, Chen X, Lee YL, Srinivasan KG, Chew J-L, Ruan Y, Wei C-L, Ng HH, et al.  
694 2008. Evolution of the mammalian transcription factor binding repertoire via transposable  
695 elements. *Genome Res* **18**: 1752–1762. doi:10.1101/gr.080663.108
- 696 Brattås PL, Jönsson ME, Fasching L, Nelander Wahlestedt J, Shahsavani M, Falk R, Falk A, Jern P, Parmar  
697 M, Jakobsson J. 2017. TRIM28 Controls a Gene Regulatory Network Based on Endogenous  
698 Retroviruses in Human Neural Progenitor Cells. *Cell Rep* **18**: 1–11.  
699 doi:10.1016/j.celrep.2016.12.010
- 700 Brouha B, Schustak J, Badge RM, Lutz-Prigge S, Farley AH, Moran J V, Kazazian HH. 2003. Hot L1s  
701 account for the bulk of retrotransposition in the human population. *Proc Natl Acad Sci U S A* **100**:  
702 5280–5285. doi:10.1073/pnas.0831042100
- 703 Cardoso-Moreira M, Halbert J, Valloton D, Velten B, Chen C, Shao Y, Liechti A, Ascensão K, Rummel C,  
704 Ovchinnikova S, et al. 2019. Gene expression across mammalian organ development. *Nature* **571**:  
705 505–509. doi:10.1038/s41586-019-1338-5
- 706 Chang D, Nalls MA, Hallgrímsdóttir IB, Hunkapiller J, van der Brug M, Cai F, Kerchner GA, Ayalon G,  
707 Bingol B, Sheng M, et al. 2017. A meta-analysis of genome-wide association studies identifies 17  
708 new Parkinson’s disease risk loci. *Nat Genet* **49**: 1511–1516. doi:10.1038/ng.3955
- 709 Chavez A, Scheiman J, Vora S, Pruitt BW, Tuttle M, P R Iyer E, Lin S, Kiani S, Guzman CD, Wiegand DJ,  
710 et al. 2015. Highly efficient Cas9-mediated transcriptional programming. *Nat Methods* **12**: 326–  
711 328. doi:10.1038/nmeth.3312
- 712 Chen W, Schwalie PC, Pankevich E V., Gubelmann C, Raghav SK, Dainese R, Cassano M, Imbeault M,  
713 Jang SM, Russeil J, et al. 2019. ZFP30 promotes adipogenesis through the KAP1-mediated  
714 activation of a retrotransposon-derived *Pparg2* enhancer. *Nat Commun* **10**: 1809.  
715 doi:10.1038/s41467-019-09803-9
- 716 Chuong EB, Elde NC, Feschotte C. 2017. Regulatory activities of transposable elements: from conflicts  
717 to benefits. *Nat Rev Genet* **18**: 71–86. doi:10.1038/nrg.2016.139
- 718 Chuong EB, Elde NC, Feschotte C. 2016. Regulatory evolution of innate immunity through co-option of  
719 endogenous retroviruses. *Science (80- )* **351**: 1083–1087. doi:10.1126/science.aad5497

- 720 Chuong EB, Rumi M a K, Soares MJ, Baker JC. 2013. Endogenous retroviruses function as species-  
721 specific enhancer elements in the placenta. *Nat Genet* **45**: 325–329. doi:10.1038/ng.2553
- 722 Cock PJA, Antao T, Chang JT, Chapman BA, Cox CJ, Dalke A, Friedberg I, Hamelryck T, Kauff F, Wilczynski  
723 B, et al. 2009. Biopython: freely available Python tools for computational molecular biology and  
724 bioinformatics. *Bioinformatics* **25**: 1422–1423. doi:10.1093/bioinformatics/btp163
- 725 Cohen CJ, Lock WM, Mager DL. 2009. Endogenous retroviral LTRs as promoters for human genes: A  
726 critical assessment. *Gene* **448**: 105–114. doi:10.1016/j.gene.2009.06.020
- 727 Concordet J-P, Haeussler M. 2018. CRISPOR: intuitive guide selection for CRISPR/Cas9 genome editing  
728 experiments and screens. *Nucleic Acids Res* **46**: W242–W245. doi:10.1093/nar/gky354
- 729 Coufal NG, Garcia-Perez JL, Peng GE, Yeo GW, Mu Y, Lovci MT, Morell M, O’Shea KS, Moran J V., Gage  
730 FH. 2009. L1 retrotransposition in human neural progenitor cells. *Nature* **460**: 1127–1131.  
731 doi:10.1038/nature08248
- 732 Cui L, Gong X, Tang Y, Kong L, Chang M, Geng H, Xu K, Wang F. 2016. Relationship between the LHPP  
733 Gene Polymorphism and Resting-State Brain Activity in Major Depressive Disorder. *Neural Plast*  
734 **2016**: 1–8. doi:10.1155/2016/9162590
- 735 Derrien T, Johnson R, Bussotti G, Tanzer A, Djebali S, Tilgner H, Guernec G, Martin D, Merkel A, Knowles  
736 DG, et al. 2012. The GENCODE v7 catalog of human long noncoding RNAs: Analysis of their gene  
737 structure, evolution, and expression. *Genome Res* **22**: 1775–1789. doi:10.1101/gr.132159.111
- 738 Dietmann S, Keogh MJ, Tang WW, Magnusdottir E, Kobayashi T, Chinnery P, Surani A. 2020.  
739 Transposable elements resistant to epigenetic resetting in the human germline are epigenetic  
740 hotspots for development and disease. *bioRxiv*. doi:10.1101/2020.03.19.998930
- 741 Ecco G, Cassano M, Kauzlaric A, Duc J, Coluccio A, Offner S, Imbeault M, Rowe HM, Turelli P, Trono D.  
742 2016. Transposable Elements and Their KRAB-ZFP Controllers Regulate Gene Expression in Adult  
743 Tissues. *Dev Cell* **36**: 611–623. doi:10.1016/j.devcel.2016.02.024
- 744 Ecco G, Imbeault M, Trono D. 2017. KRAB zinc finger proteins. *Development* **144**: 2719–2729.  
745 doi:10.1242/dev.132605
- 746 Erwin JA, Paquola ACM, Singer T, Gallina I, Novotny M, Quayle C, Bedrosian TA, Alves FIA, Butcher CR,  
747 Herdy JR, et al. 2016. L1-associated genomic regions are deleted in somatic cells of the healthy  
748 human brain. *Nat Neurosci* **19**: 1583–1591. doi:10.1038/nn.4388
- 749 Farmiloe G, Lodewijk GA, Robben SF, van Bree EJ, Jacobs FMJ. 2020. Widespread correlation of KRAB  
750 zinc finger protein binding with brain-developmental gene expression patterns. *Philos Trans R*  
751 *Soc B Biol Sci* **375**: 20190333. doi:10.1098/rstb.2019.0333
- 752 Forrest ARR, Kawaji H, Rehli M, Baillie JK, De Hoon MJL, Haberle V, Lassmann T, Kulakovskiy I V., Lizio  
753 M, Itoh M, et al. 2014. A promoter-level mammalian expression atlas. *Nature* **507**: 462–470.  
754 doi:10.1038/nature13182
- 755 Fullard JF, Hauberg ME, Bendl J, Egervari G, Cirnaru M-D, Reach SM, Motl J, Ehrlich ME, Hurd YL,  
756 Roussos P. 2018. An atlas of chromatin accessibility in the adult human brain. *Genome Res* **28**:  
757 1243–1252. doi:10.1101/gr.232488.117
- 758 Garcia-Perez JL, Widmann TJ, Adams IR. 2016. The impact of transposable elements on mammalian  
759 development. *Development* **143**: 4101–4114. doi:10.1242/dev.132639
- 760 Gentleman RC, Carey VJ, Bates DM, Bolstad B, Dettling M, Dudoit S, Ellis B, Gautier L, Ge Y, Gentry J, et  
761 al. 2004. Bioconductor: open software development for computational biology and  
762 bioinformatics. *Genome Biol* **5**: R80. doi:10.1186/gb-2004-5-10-r80

- 763 Guffanti G, Bartlett A, Klengel T, Klengel C, Hunter R, Glinsky G, Macciardi F. 2018. Novel Bioinformatics  
764 Approach Identifies Transcriptional Profiles of Lineage-Specific Transposable Elements at Distinct  
765 Loci in the Human Dorsolateral Prefrontal Cortex ed. I. Arkhipova. *Mol Biol Evol* **35**: 2435–2453.  
766 doi:10.1093/molbev/msy143/5056710
- 767 Helleboid P, Heusel M, Duc J, Piot C, Thorball CW, Coluccio A, Pontis J, Imbeault M, Turelli P, Aebersold  
768 R, et al. 2019. The interactome of <sc>KRAB</sc> zinc finger proteins reveals the evolutionary  
769 history of their functional diversification. *EMBO J* **38**: 1–16. doi:10.15252/embj.2018101220
- 770 Hubley R, Finn RD, Clements J, Eddy SR, Jones TA, Bao W, Smit AFA, Wheeler TJ. 2016. The Dfam  
771 database of repetitive DNA families. *Nucleic Acids Res* **44**: D81–D89. doi:10.1093/nar/gkv1272
- 772 Huntley S, Baggott DM, Hamilton AT, Tran-Gyamfi M, Yang S, Kim J, Gordon L, Branscomb E, Stubbs L.  
773 2006. A comprehensive catalog of human KRAB-associated zinc finger genes: Insights into the  
774 evolutionary history of a large family of transcriptional repressors. *Genome Res* **16**: 669–677.  
775 doi:10.1101/gr.4842106
- 776 Imbeault M, Helleboid P-Y, Trono D. 2017. KRAB zinc-finger proteins contribute to the evolution of  
777 gene regulatory networks. *Nature* **543**: 550–554. doi:10.1038/nature21683
- 778 Ito J, Kimura I, Soper A, Coudray A, Koyanagi Y, Nakaoka H, Inoue I, Turelli P, Trono D, Sato K. 2020.  
779 Endogenous retroviruses drive KRAB zinc-finger protein family expression for tumor suppression.  
780 *Sci Adv* **6**: eabc3020. doi:10.1126/sciadv.abc3020
- 781 Jacobs FMJ, Greenberg D, Nguyen N, Haeussler M, Ewing AD, Katzman S, Paten B, Salama SR, Haussler  
782 D. 2014. An evolutionary arms race between KRAB zinc-finger genes ZNF91/93 and SVA/L1  
783 retrotransposons. *Nature* **516**: 242–245. doi:10.1038/nature13760
- 784 Jang HS, Shah NM, Du AY, Dailey ZZ, Pehrsson EC, Godoy PM, Zhang D, Li D, Xing X, Kim S, et al. 2019.  
785 Transposable elements drive widespread expression of oncogenes in human cancers. *Nat Genet*  
786 **51**: 611–617. doi:10.1038/s41588-019-0373-3
- 787 Jönsson ME, Garza R, Johansson PA, Jakobsson J. 2020. Transposable Elements: A Common Feature of  
788 Neurodevelopmental and Neurodegenerative Disorders. *Trends Genet* **36**: 610–623.  
789 doi:10.1016/j.tig.2020.05.004
- 790 Jönsson ME, Ludvik Brattås P, Gustafsson C, Petri R, Yudovich D, Piracs K, Verschuere S, Madsen S,  
791 Hansson J, Larsson J, et al. 2019. Activation of neuronal genes via LINE-1 elements upon global  
792 DNA demethylation in human neural progenitors. *Nat Commun* **10**: 3182. doi:10.1038/s41467-  
793 019-11150-8
- 794 Kang HJ, Kawasawa YI, Cheng F, Zhu Y, Xu X, Li M, Sousa AMM, Pletikos M, Meyer KA, Sedmak G, et al.  
795 2011. Spatio-temporal transcriptome of the human brain. *Nature* **478**: 483–489.  
796 doi:10.1038/nature10523
- 797 Katz Y, Wang ET, Silterra J, Schwartz S, Wong B, Thorvaldsdóttir H, Robinson JT, Mesirov JP, Airoidi EM,  
798 Burge CB. 2015. Quantitative visualization of alternative exon expression from RNA-seq data.  
799 *Bioinformatics* **31**: 2400–2402. doi:10.1093/bioinformatics/btv034
- 800 Keil JM, Qalieh A, Kwan KY. 2018. Brain Transcriptome Databases: A User’s Guide. *J Neurosci* **38**: 2399–  
801 2412. doi:10.1523/JNEUROSCI.1930-17.2018
- 802 Kelley DR, Rinn JL. 2012. Transposable elements reveal a stem cell specific class of long noncoding  
803 RNAs. *Genome Biol* **13**: R107. doi:10.1186/gb-2012-13-11-r107
- 804 Kent WJ. 2002. BLAT---The BLAST-Like Alignment Tool. *Genome Res* **12**: 656–664.  
805 doi:10.1101/gr.229202

- 806 Kim D, Langmead B, Salzberg SL. 2015. HISAT: a fast spliced aligner with low memory requirements.  
807 *Nat Methods* **12**: 357–360. doi:10.1038/nmeth.3317
- 808 Kovaka S, Zimin A V., Pertea GM, Razaghi R, Salzberg SL, Pertea M. 2019. Transcriptome assembly from  
809 long-read RNA-seq alignments with StringTie2. *Genome Biol* **20**: 278. doi:10.1186/s13059-019-  
810 1910-1
- 811 Kumanogoh A, Kikutani H. 2004. Biological functions and signaling of a transmembrane semaphorin,  
812 CD100/Sema4D. *Cell Mol Life Sci* **61**: 292–300. doi:10.1007/s00018-003-3257-7
- 813 Lambert SA, Jolma A, Campitelli LF, Das PK, Yin Y, Albu M, Chen X, Taipale J, Hughes TR, Weirauch MT.  
814 2018. The Human Transcription Factors. *Cell* **172**: 650–665. doi:10.1016/j.cell.2018.01.029
- 815 Lanciano S, Cristofari G. 2020. Measuring and interpreting transposable element expression. *Nat Rev*  
816 *Genet* **21**: 721–736. doi:10.1038/s41576-020-0251-y
- 817 Law CW, Chen Y, Shi W, Smyth GK. 2014. voom: precision weights unlock linear model analysis tools  
818 for RNA-seq read counts. *Genome Biol* **15**: R29. doi:10.1186/gb-2014-15-2-r29
- 819 Li M, Santpere G, Imamura Kawasawa Y, Evgrafov O V., Gulden FO, Pochareddy S, Sunkin SM, Li Z, Shin  
820 Y, Zhu Y, et al. 2018. Integrative functional genomic analysis of human brain development and  
821 neuropsychiatric risks. *Science (80- )* **362**: eaat7615. doi:10.1126/science.aat7615
- 822 Li W, Lee M-H, Henderson L, Tyagi R, Bachani M, Steiner J, Campanac E, Hoffman DA, von Geldern G,  
823 Johnson K, et al. 2015. Human endogenous retrovirus-K contributes to motor neuron disease. *Sci*  
824 *Transl Med* **7**: 307ra153. doi:10.1126/scitranslmed.aac8201
- 825 Liang JR, Lingeman E, Luong T, Ahmed S, Muhar M, Nguyen T, Olzmann JA, Corn JE. 2020. A Genome-  
826 wide ER-phagy Screen Highlights Key Roles of Mitochondrial Metabolism and ER-Resident  
827 UFMylation. *Cell* **180**: 1160-1177.e20. doi:10.1016/j.cell.2020.02.017
- 828 Liao Y, Smyth GK, Shi W. 2014. featureCounts: an efficient general purpose program for assigning  
829 sequence reads to genomic features. *Bioinformatics* **30**: 923–930.  
830 doi:10.1093/bioinformatics/btt656
- 831 Linker SB, Randolph-Moore L, Kottlilil K, Qiu F, Jaeger BN, Barron J, Gage FH. 2020. Identification of  
832 bona fide B2 SINE retrotransposon transcription through single-nucleus RNA-seq of the mouse  
833 hippocampus. *Genome Res* **30**: 1643–1654. doi:10.1101/gr.262196.120
- 834 Liu J, Aoki M, Illa I, Wu C, Fardeau M, Angelini C, Serrano C, Urtizberea JA, Hentati F, Hamida M Ben, et  
835 al. 1998. Dysferlin, a novel skeletal muscle gene, is mutated in Miyoshi myopathy and limb girdle  
836 muscular dystrophy. *Nat Genet* **20**: 31–36. doi:10.1038/1682
- 837 Liu J, Wang Y, Song L, Zeng L, Yi W, Liu T, Chen H, Wang M, Ju Z, Cong Y-S. 2017. A critical role of  
838 DDRGK1 in endoplasmic reticulum homeostasis via regulation of IRE1 $\alpha$  stability. *Nat Commun*  
839 **8**: 14186. doi:10.1038/ncomms14186
- 840 Lizio M, Harshbarger J, Shimoji H, Severin J, Kasukawa T, Sahin S, Abugessaisa I, Fukuda S, Hori F,  
841 Ishikawa-Kato S, et al. 2015. Gateways to the FANTOM5 promoter level mammalian expression  
842 atlas. *Genome Biol* **16**: 22. doi:10.1186/s13059-014-0560-6
- 843 Mali P, Yang L, Esvelt KM, Aach J, Guell M, DiCarlo JE, Norville JE, Church GM. 2013. RNA-Guided Human  
844 Genome Engineering via Cas9. *Science (80- )* **339**: 823–826. doi:10.1126/science.1232033
- 845 McCormack K, Connor JX, Zhou L, Ho LL, Ganetzky B, Chiu S-Y, Messing A. 2002. Genetic Analysis of the  
846 Mammalian K + Channel  $\beta$  Subunit Kv $\beta$ 2 ( Kcnab2 ). *J Biol Chem* **277**: 13219–13228.  
847 doi:10.1074/jbc.M111465200



- 848 Melé M, Ferreira PG, Reverter F, DeLuca DS, Monlong J, Sammeth M, Young TR, Goldmann JM,  
849 Pervouchine DD, Sullivan TJ, et al. 2015. The human transcriptome across tissues and individuals.  
850 *Science (80- )* **348**: 660–665. doi:10.1126/science.aaa0355
- 851 Miao B, Fu S, Lyu C, Gontarz P, Wang T, Zhang B. 2020. Tissue-specific usage of transposable element-  
852 derived promoters in mouse development. *Genome Biol* **21**: 255. doi:10.1186/s13059-020-  
853 02164-3
- 854 Miller JA, Ding S-L, Sunkin SM, Smith KA, Ng L, Szafer A, Ebbert A, Riley ZL, Royall JJ, Aiona K, et al. 2014.  
855 Transcriptional landscape of the prenatal human brain. *Nature* **508**: 199–206. doi:  
856 10.1038/nature13185
- 857 Muotri AR, Chu VT, Marchetto MCN, Deng W, Moran J V., Gage FH. 2005. Somatic mosaicism in  
858 neuronal precursor cells mediated by L1 retrotransposition. *Nature* **435**: 903–910. doi:  
859 10.1038/nature03663
- 860 Muotri AR, Marchetto MCN, Coufal NG, Oefner R, Yeo G, Nakashima K, Gage FH. 2010. L1  
861 retrotransposition in neurons is modulated by MeCP2. *Nature* **468**: 443–446.  
862 doi:10.1038/nature09544
- 863 Najafabadi HS, Mnaimneh S, Schmitges FW, Garton M, Lam KN, Yang A, Albu M, Weirauch MT,  
864 Radovani E, Kim PM, et al. 2015. C2H2 zinc finger proteins greatly expand the human regulatory  
865 lexicon. *Nat Biotechnol* **33**: 555–562. doi:10.1038/nbt.3128
- 866 Nalls MA, Pankratz N, Lill CM, Do CB, Hernandez DG, Saad M, DeStefano AL, Kara E, Bras J, Sharma M,  
867 et al. 2014. Large-scale meta-analysis of genome-wide association data identifies six new risk loci  
868 for Parkinson’s disease. *Nat Genet* **46**: 989–993. doi:10.1038/ng.3043
- 869 Neff CD, Abkevich V, Packer JCL, Chen Y, Potter J, Riley R, Davenport C, DeGrado Warren J, Jammulapati  
870 S, Bhatena A, et al. 2009. Evidence for HTR1A and LHPP as interacting genetic risk factors in  
871 major depression. *Mol Psychiatry* **14**: 621–630. doi:10.1038/mp.2008.8
- 872 Nowick K, Gernat T, Almaas E, Stubbs L. 2009. Differences in human and chimpanzee gene expression  
873 patterns define an evolving network of transcription factors in brain. *Proc Natl Acad Sci* **106**:  
874 22358–22363. doi:10.1073/pnas.0911376106
- 875 Pontis J, Planet E, Offner S, Turelli P, Duc J, Coudray A, Theunissen TW, Jaenisch R, Trono D. 2019.  
876 Hominoid-Specific Transposable Elements and KZFPs Facilitate Human Embryonic Genome  
877 Activation and Control Transcription in Naive Human ESCs. *Cell Stem Cell* **24**: 724-735.e5.  
878 doi:10.1016/j.stem.2019.03.012
- 879 Quinlan AR, Hall IM. 2010. BEDTools: a flexible suite of utilities for comparing genomic features.  
880 *Bioinformatics* **26**: 841–842. doi:10.1093/bioinformatics/btq033
- 881 Robinson JT, Thorvaldsdóttir H, Winckler W, Guttman M, Lander ES, Getz G, Mesirov JP. 2011.  
882 Integrative genomics viewer. *Nat Biotechnol* **29**: 24–26. doi:10.1038/nbt.1754
- 883 Sundaram V, Cheng Y, Ma Z, Li D, Xing X, Edge P, Snyder MP, Wang T. 2014. Widespread contribution  
884 of transposable elements to the innovation of gene regulatory networks. *Genome Res* **24**: 1963–  
885 1976. doi:doi/10.1101/gr.168872.113
- 886 Takahashi N, Coluccio A, Thorball CW, Planet E, Shi H, Offner S, Turelli P, Imbeault M, Ferguson-Smith  
887 AC, Trono D. 2019. ZNF445 is a primary regulator of genomic imprinting. *Genes Dev* **33**: 49–54.  
888 doi:10.1101/gad.320069.118
- 889 Tam OH, Ostrow LW, Gale Hammell M. 2019. Diseases of the nERVous system: retrotransposon activity  
890 in neurodegenerative disease. *Mob DNA* **10**: 32. doi:10.1186/s13100-019-0176-1

- 891 Theunissen TW, Friedli M, He Y, Planet E, O'Neil RC, Markoulaki S, Pontis J, Wang H, Iouranova A,  
892 Imbeault M, et al. 2016. Molecular Criteria for Defining the Naive Human Pluripotent State. *Cell*  
893 *Stem Cell* **19**: 502–515. doi:10.1016/j.stem.2016.06.011
- 894 Thorball CW, Planet E, de Tribolet-Hardy J, Coudray A, Fellay J, Turelli P, Trono D. 2020. Ongoing  
895 evolution of KRAB zinc finger protein-coding genes in modern humans. *bioRxiv*  
896 doi:10.1101/2020.09.01.277178
- 897 Trono D. 2015. Transposable Elements, Polydactyl Proteins, and the Genesis of Human-Specific  
898 Transcription Networks. *Cold Spring Harb Symp Quant Biol* **80**: 281–288.  
899 doi:10.1101/sqb.2015.80.027573
- 900 Turelli P, Playfoot C, Grun D, Raclot C, Pontis J, Coudray A, Thorball C, Duc J, Pankevich E V., Deplancke  
901 B, et al. 2020. Primate-restricted KRAB zinc finger proteins and target retrotransposons control  
902 gene expression in human neurons. *Sci Adv* **6**: eaba3200. doi:10.1126/sciadv.aba3200
- 903 Untergasser A, Cutcutache I, Koressaar T, Ye J, Faircloth BC, Remm M, Rozen SG. 2012. Primer3—new  
904 capabilities and interfaces. *Nucleic Acids Res* **40**: e115–e115. doi:10.1093/nar/gks596
- 905 Upton KR, Gerhardt DJ, Jesuadian JS, Richardson SR, Sánchez-Luque FJ, Bodea GO, Ewing AD, Salvador-  
906 Palomeque C, van der Knaap MS, Brennan PM, et al. 2015. Ubiquitous L1 Mosaicism in  
907 Hippocampal Neurons. *Cell* **161**: 228–239. doi:10.1016/j.cell.2015.03.026
- 908 van Kuilenburg AB., Meinsma R, Vreken P, Waterham HR, van Gennip AH. 2000. Identification of a  
909 cDNA encoding an isoform of human CTP synthetase. *Biochim Biophys Acta - Gene Struct Expr*  
910 **1492**: 548–552. doi:10.1016/S0167-4781(00)00141-X
- 911 Xu J-H, Wang T, Wang X-G, Wu X-P, Zhao Z-Z, Zhu C-G, Qiu H-L, Xue L, Shao H-J, Guo M-X, et al. 2010.  
912 PU.1 can regulate the ZNF300 promoter in APL-derived promyelocytes HL-60. *Leuk Res* **34**: 1636–  
913 1646. doi:10.1016/j.leukres.2010.04.009
- 914 Zhong S, Zhang S, Fan X, Wu Q, Yan L, Dong J, Zhang H, Li L, Sun L, Pan N, et al. 2018. A single-cell RNA-  
915 seq survey of the developmental landscape of the human prefrontal cortex. *Nature* **555**: 524–  
916 528. doi:10.1038/nature25980
- 917 Zimmer-Bensch G. 2019. Emerging Roles of Long Non-Coding RNAs as Drivers of Brain Evolution. *Cells*  
918 **8**: 1399. doi:10.3390/cells8111399
- 919
- 920
